# Supplementary material for: Doppler‐Derived Renal Venous Stasis Index in the Prognosis of Right Heart Failure
Source: PubMed Central journal article supplement — J Am Heart Assoc. 2019 Oct 19;8(21):e013584. doi: 10.1161/JAHA.119.013584 (PMC6898799; doi:10.1161/jaha.119.013584), 2019-10-19
Supplement: JAH3-8-e013584-s001.pdf [file JAH3-8-e013584-s001.pdf]

# **SUPPLEMENTAL MATERIAL**

## **Data S1.**

### **SUPPLEMENTAL METHODS**

#### **Study design and participants**

##### ***Data collection***

Clinical variables were abstracted from patient medical records. All clinical and laboratory data, including patient demographics, were collected and stored in a password-protected dataset.

##### ***Right heart catheterization (RHC)***

All RHC measures were derived at end-expiration, and reported values represent the average of 5 to 10 cardiac cycles. Cardiac output (average of three cycles with <10% variation in patients in sinus rhythm and five cardiac cycles in patients with atrial fibrillation) was derived by both thermodilution and the Fick method using nomograms for oxygen uptake in conjunction with the Fick method. If patients did not have supplemental oxygen therapy, the direct Fick method was performed directly after oxygen uptake assessment. When a discrepancy was present between both methods, cardiac output was reported by direct Fick; if direct Fick measurement was not possible, thermodilution was used. Pulmonary vascular resistance and cardiac index were calculated as described previously (pulmonary vascular resistance=[mean pulmonary arterial pressure–pulmonary capillary wedge pressure]/cardiac output; cardiac index=[cardiac output/body surface area]).<sup>1</sup>

##### ***Bioimpedance spectroscopy***

Bioimpedance is based on the principle that the body acts as a circuit with a given resistance (opposition of current flow through intracellular and extracellular solutions [R<sub>i</sub> and R<sub>e</sub>]) and reactance (the capacitance of cells to store energy [X<sub>c</sub>]).<sup>2</sup> The volume of the body fluid component is largely reflected in the resistance, whereas reactance might represent cell membrane integrity. The impedance is composed of the sum of resistance and reactance ( $\sqrt{R^2 + X_c^2}$ ).<sup>3</sup> Another parameter that can be derived is the phase angle, which is the arc tangent of X<sub>c</sub>/R. When a current passes through cells, a portion of the electrical current is stored and subsequently released in a different phase, termed “phase angle”. The phase angle is related to the ability of cells to function as capacitors, which is dependent on the integrity of the cell membrane and cellular health. Bioimpedance data from the study population are provided in Table S4.

The three-compartment model of the BCM Body Composition Monitor has been validated against standard reference methods for assessment of fluid status and body composition in patients undergoing hemodialysis and peritoneal dialysis, albeit partly against gold standard techniques in healthy controls only.<sup>4-7</sup> BCM has been shown to be valid in different ethnicities<sup>5</sup>, and measures impedance at 50 different frequencies between 5 kHz and 1 MHz. Reproducibility of BCM-derived parameters is high, with a coefficient of variation for the inter-observer variability for extracellular water and total body water around 1.2% in studies<sup>8</sup> performed in patients undergoing hemodialysis. Therefore, only one BCM measurement was performed in each individual patient. BCM results are normalized by sex and patient height. According to the manufacturer’s recommendations we excluded patients if they had an unipolar pacemaker, while there were no limitations for patients with stents or bipolar pacemakers.<sup>9</sup> For measurement, the skin was cleansed with alcohol, then the electrodes were attached to one hand and one foot at the ipsilateral side, after the patient had been supine for at least 5 minutes and not touching any metal objects.

Hydration status (expressed in Liters) was derived from the impedance data based on a physiologic tissue model that separates the body into three compartments<sup>4</sup>: surplus water, normohydrated lean tissue, and fat tissue. Hydration status represents the difference between the measured amount of extracellular water and the amount of water expected in normohydrated tissue conditions. Patients are considered ‘dehydrated’ or ‘overhydrated’ when their absolute hydration status is below the 10th or above the 90th percentile of the normal, presumed healthy, reference population, respectively (corresponding to 1.1 L of negative or positive hydration status, respectively).<sup>10, 11</sup> Due to bio-physical reasons, bioimpedance spectroscopy does not measure sequestered fluid in the trunk, and presence of pleural effusion and ascites was documented by ultrasound.<sup>12</sup> Lean tissue mass represents the body mass without adipose tissue and excess extracellular water (fluid overload). Fat represents the mass of adipose lipids in the body. Lean tissue mass and fat are provided in kilograms as well as in relation to body weight (%). Lean tissue index is calculated as the quotient of lean tissue mass/height. Fat tissue index is defined as the quotient of adipose tissue mass/height. Adipose tissue mass is the mass of the adipose tissue, including the adipose water. Body cell mass represents the cellular, metabolically active body mass, excluding the extracellular fluid in the metabolically active tissue.<sup>12</sup>

##### ***Intra-abdominal pressure measurement***

Intra-abdominal pressure was measured with a standard Foley catheter, which was connected to a pressure transducer placed in-line with the iliac crest at the midaxillary line. The Foley catheter was flushed with a maximal instillation volume of 50 mL sterile saline via the aspiration port of the Foley catheter with the drainage

tube clamped to allow a fluid-filled column to develop up into the bladder. A pressure transducer was then inserted in the aspiration port, and the pressure was measured. The intra-abdominal pressure was expressed in mm Hg and was measured at end-expiration in the supine position, ensuring that abdominal muscle contractions were absent.

### **Laboratory methods**

Blood and urine samples were centrifuged for 10 minutes at 3000xg and 5 minutes at 500xg, respectively. Samples were processed within 30 minutes of collection.

B-type natriuretic peptide (BNP) and parathormone were measured by the chemiluminescence method on an Advia Centaur XPT analyzer (Siemens Healthcare GmbH, Erlangen, Germany). BNP >35 pg/mL was taken as the cut-off for diagnosing chronic heart failure.<sup>13</sup> Copeptin was measured by the Time-Resolve-Amplified Cryptate Emission method on a Brahms Kryptor Compact Plus (Thermo Fisher Scientific, MA, USA). The range of copeptin, a surrogate marker for proarginine vasopressin release and neurohormonal activation, in healthy individuals has been recently described as 4.2 [9.5] pmol/L.<sup>14</sup> Serum aldosterone was measured by the radioimmunological method on a Multi Crystal LB 2111 Gamma Counter (Berthold Technologies, Bad Wildbach, Germany). Urine sodium-to-potassium ratio <2 was considered as a marker of hyperaldosteronism. Urine fractional excretion of sodium <1% was considered as a marker of sodium retention. Cystatin C was measured by the immunoturbidimetric method on an AU5800 Chemistry Analyzer (Beckman Coulter, California, USA) with reference material ERM-DA471/IFCC (distributed by the European Joint Research Institute for Reference Materials and Measurements, Geil, Belgium).<sup>15</sup> Creatinine was measured by the photometric-enzymatic method on an Advia Centaur XPT analyzer, with calibration to isotope dilution mass spectrometry reference measurements. Blood urea nitrogen-to-creatinine ratio >20 was considered as a marker of neurohormonally mediated disproportionate reabsorption of urea compared with that of creatinine.<sup>16</sup> Creatinine clearance was calculated as: urine creatinine (mg/dL) x urine volume (mL) x 1.73 (m<sup>2</sup>)/1440 min x serum creatinine (mg/dL) x body surface area (m<sup>2</sup>). For calculation of urea clearance, creatinine was substituted with urea.

Proteinuria was measured using a colorimetric method with pyrogallol red on an AU5800 Chemistry Analyzer. Albuminuria was measured by the immunoturbidimetric method on a Advia Centaur XPT, and alpha 1-microglobulin was measured by the immunonephelometric method on a BNII analyzer (Siemens Healthcare GmbH, Erlangen, Germany). Protein-to-creatinine ratio, albumin-to-creatinine ratio, and alpha 1-microglobulin-to-creatinine ratio (all reported in units of mg/g creatinine) were then calculated. Microalbuminuria and increased tubular proteinuria (alpha 1 microglobulin) were defined as values  $\geq 30$ mg/g and  $\geq 20$ mg/g creatinine, respectively.<sup>17, 18</sup> Positive acanthocyturia, a diagnostic criterion of glomerulonephritis, was defined as  $\geq 5\%$  acanthocytes in centrifuged urinary sediment detected with a phase-contrast microscope Eclipse Ci-L (Nikon, Tokyo, Japan).<sup>19</sup> Sterile leukocyturia, associated with interstitial nephritis, nephrolithiasis, uroepithelial tumors, and infection with atypical organisms, was defined as a positive urinary dip stick test for leukocyte esterase in combination with a negative urine culture.<sup>20</sup>

### **Renal replacement therapy (RRT)**

Patients with fluid overload received a stepped pharmacological diuretic therapy including adjustable doses of intravenous loop diuretic agents, thiazide diuretic agents, and aldosterone antagonists. Patients who fulfilled the criteria for diuretic resistance despite the stepped pharmacological therapy were transferred to RRT, as were patients who developed stage 3 acute kidney injury with fluid overload or a life-threatening complication (eg, pulmonary edema).<sup>21</sup> Modality of RRT was based on illness acuteness, patient preference, and co-morbidities (eg, presence of ascites). In general, peritoneal dialysis (conventional surgical technique; peritoneal dialysis catheter type Oreopoulous-Zellermann) was the preferred modality for patients with HF, except patients with life-threatening indications or cardiovascular instability, for whom slow extended daily hemodialysis with the GENIUS<sup>®</sup> dialysis system (Fresenius Medical Care, Bad Homburg, Germany) was preferred.

**Table S1. ICC for RVSI measured by two independent nephrologists.**

|                                   | Intraclass correlation* | 95% confidence interval |             | F test with true value 0 |     |     |              |
|-----------------------------------|-------------------------|-------------------------|-------------|--------------------------|-----|-----|--------------|
|                                   |                         | Lower bound             | Upper bound | Value                    | df1 | df2 | Significance |
| <b>Inter-observer reliability</b> |                         |                         |             |                          |     |     |              |
| Single measures                   | 0.978†                  | 0.973                   | 0.982       | 178.709                  | 204 | 612 | 0.000        |
| Average measures                  | 0.994‡                  | 0.993                   | 0.996       | 178.709                  | 204 | 612 | 0.000        |
| <b>Intra-observer reliability</b> |                         |                         |             |                          |     |     |              |
| TS – single measures              | 1.000†                  | 1.000                   | 1.000       |                          | 204 |     |              |
| TS – average measures             | 1.000‡                  | 1.000                   | 1.000       |                          | 204 |     |              |
| FH-S – single measures            | 1.000†                  | 1.000                   | 1.000       | 5302.258                 | 204 | 204 | 0.000        |
| FH-S – average measures           | 1.000‡                  | 1.000                   | 1.000       | 5302.258                 | 204 | 204 | 0.000        |

Two-way mixed effects model where people effects are random and measures effects are fixed.

\*Type A ICCs using an absolute agreement definition for inter-observer reliability; Type C ICCs using a consistency definition for intra-observer reliability.

†The estimator is the same, whether the interaction effect is present or not.

‡This estimate is computed assuming the interaction effect is absent, because it is not estimable otherwise.

df=degrees of freedom; ICC=intraclass correlation coefficient; RVSI=renal venous stasis index.

**Table S2. Classification of the RHC Cohort According to PH Subcategories.**

|                                                     | n (%)     |
|-----------------------------------------------------|-----------|
| No PH                                               | 40 (100)  |
| Disease control                                     | 27 (67.5) |
| HF with preserved ejection fraction                 | 13 (32.5) |
| Group 1 (PAH)                                       | 46 (100)  |
| Idiopathic PAH                                      | 27 (58.7) |
| Connective tissue disease                           | 8 (17.4)  |
| Congenital systemic-to-pulmonary shunts             | 6 (13.0)  |
| Porto-pulmonary PH                                  | 5 (10.9)  |
| Group 2 (PH due to left heart disease)              | 30 (100)  |
| PH-HF with preserved ejection fraction              | 30 (100)  |
| Group 3 (PH due to lung disease and/or hypoxemia)   | 41 (100)  |
| Chronic obstructive pulmonary disease               | 22 (53.7) |
| Interstitial lung disease                           | 15 (36.6) |
| Sleep-disordered breathing                          | 4 (9.8)   |
| Group 4 (chronic thromboembolic PH)                 | 34 (100)  |
| Group 5 (PH with unclear multifactorial mechanisms) | 14 (100)  |
| Sarcoidosis                                         | 9 (64.3)  |
| Churg-Strauss syndrome                              | 1 (1.6)   |
| Unknown mechanisms                                  | 4 (28.6)  |

HF denotes heart failure, PAH pulmonary arterial hypertension, PH pulmonary hypertension, and RHC right heart catheterization

**Table S3. Clinical characteristics, invasive hemodynamics, echocardiographic data, renal function, and neurohormonal and hydration status stratified according to congestion stages as determined by intrarenal venous flow patterns.**

|                                             | All patients<br>(n=205) | No congestion<br>(n=59) | Stage 1 congestion<br>(n=77) | Stage 2 congestion<br>(n=44) | Stage 3 congestion<br>(n=25) | p value* |
|---------------------------------------------|-------------------------|-------------------------|------------------------------|------------------------------|------------------------------|----------|
| <b>Baseline clinical data</b>               |                         |                         |                              |                              |                              |          |
| 6MWD, m                                     | 277.23±136.05           | 309.76±118.16           | 296.83±142.97                | 224.55±127.15                | 232.80±137.57                | 0.0022   |
| NYHA classification, n (%)                  |                         |                         |                              |                              |                              | 0.078    |
| 1–2                                         | 44 (21.5)               | 15 (25.4)               | 22 (28.6)                    | 4 (9.1)                      | 3 (12)                       |          |
| 3–4                                         | 161 (78.5)              | 44 (74.6)               | 45 (71.4)                    | 40 (90.9)                    | 22 (88)                      |          |
| Oxygen supply, n (%)                        | 118 (57.6)              | 28 (47.5)               | 45 (58.4)                    | 33 (75.0)                    | 12 (48.0)                    | 0.0306   |
| <b>Maintenance therapy</b>                  |                         |                         |                              |                              |                              |          |
| ACEi or ARB, n (%)                          | 83 (40.5)               | 23 (39.0)               | 33 (42.9)                    | 13 (29.5)                    | 14 (56.0)                    | 0.178    |
| Loop diuretic dose, mg/day                  | 40.0 [0.0–60.0]         | 20.0 [0.0–40.0]         | 20.0 [0.0–45.0]              | 40.0 [0.0–80.0]              | 80.0 [40.0–200.0]            | <0.0001  |
| Thiazide diuretic, n (%)                    | 72 (35.1)               | 18 (30.5)               | 27 (35.1)                    | 17 (38.6)                    | 10 (40.0)                    | 0.789    |
| Aldosterone antagonist, n (%)               | 76 (37.1)               | 16 (27.1)               | 30 (39.0)                    | 17 (38.6)                    | 13 (52.0)                    | 0.168    |
| Triamterene, n (%)                          | 5 (2.4)                 | 0 (0)                   | 3 (3.9)                      | 2 (4.5)                      | 0 (0)                        | 0.307    |
| <b>PH-specific therapy, n (%)</b>           |                         |                         |                              |                              |                              | 0.433    |
| Treatment-naïve                             | 116 (56.6)              | 42 (71.2)               | 36 (46.8)                    | 24 (54.5)                    | 14 (56.0)                    |          |
| Monotherapy                                 | 49 (23.9)               | 8 (13.6)                | 23 (29.9)                    | 11 (25.0)                    | 7 (28.0)                     |          |
| Dual therapy                                | 28 (13.7)               | 6 (10.2)                | 13 (16.9)                    | 6 (13.6)                     | 3 (12.0)                     |          |
| Triple therapy                              | 12 (5.9)                | 3 (5.1)                 | 5 (6.5)                      | 3 (6.8)                      | 1 (4.0)                      |          |
| <b>Hemodynamics</b>                         |                         |                         |                              |                              |                              |          |
| Mean PAP, mm Hg                             | 34.84±14.63             | 24.10±9.62              | 37.14±15.02                  | 42.84±12.33                  | 39.00±13.11                  | <0.0001  |
| PVR, dyn.s/cm <sup>5</sup>                  | 394 [214–604]           | 229 [110–420]           | 440 [277–600]                | 558 [293–829]                | 428 [245–750]                | <0.0001  |
| RAP, mm Hg                                  | 5.76±5.63               | 2.46±3.66               | 4.44±4.75                    | 9.00±5.04                    | 11.88±7.54                   | <0.0001  |
| Cardiac index, L/min/m <sup>2</sup>         | 2.73±0.98               | 2.98±1.01               | 2.76±1.00                    | 2.47±0.70                    | 2.48±1.13                    | 0.0332   |
| PCWP, mm Hg                                 | 9.0 [5.0–13.0]          | 7.0 [4.0–10.0]          | 9.0 [6.0–13.0]               | 10.5 [6.0–15.8]              | 12.0 [8.5–18.5]              | <0.0001  |
| Mixed venous oxygen saturation, %           | 63.76±8.35              | 66.70±6.42              | 65.11±6.59                   | 59.83±9.70                   | 59.60±10.63                  | <0.0001  |
| Heart rate, beats/min                       | 71.62±13.23             | 72.00±11.32             | 70.34±12.55                  | 72.23±13.49                  | 73.60±18.51                  | 0.703    |
| MAP, mm Hg†                                 | 84.25±11.57             | 85.22±10.28             | 83.71±12.18                  | 85.69±13.06                  | 81.09±9.48                   | 0.375    |
| <b>Echocardiographic parameters</b>         |                         |                         |                              |                              |                              |          |
| <i>Right heart</i>                          |                         |                         |                              |                              |                              |          |
| TAPSE, mm                                   | 19.89±4.41              | 21.88±3.82              | 20.87±4.01                   | 18.18±3.80                   | 15.20±3.46                   | <0.0001  |
| RV myocardial performance index (Tei index) | 0.49±0.22               | 0.46±0.20               | 0.47±0.23                    | 0.55±0.23                    | 0.48±0.22                    | 0.323    |
| RV S', cm/s                                 | 11.60±3.52              | 12.95±3.31              | 12.18±3.20                   | 10.17±3.23                   | 9.08±3.43                    | <0.0001  |
| TAPSE/Systolic PAP ratio                    | 0.39±0.21               | 0.56±0.27               | 0.35±0.15                    | 0.30±0.11                    | 0.30±0.13                    | <0.0001  |
| Tricuspid insufficiency, n (%)              |                         |                         |                              |                              |                              | 0.0007   |
| Mild                                        | 66 (32.2)               | 34 (57.6)               | 15 (19.5)                    | 12 (27.3)                    | 5 (20)                       |          |
| Moderate                                    | 112 (54.6)              | 23 (39.0)               | 51 (66.2)                    | 25 (56.8)                    | 13 (52)                      |          |
| Severe                                      | 25 (12.2)               | 1 (1.7)                 | 10 (13.0)                    | 7 (15.9)                     | 7 (28)                       |          |
| RA area, cm <sup>2</sup>                    | 18.89±6.72              | 14.14±6.30              | 18.87±5.70                   | 20.99±6.24                   | 24.16±6.60                   | <0.0001  |
| RV diameter, mm                             | 40.78±8.08              | 37.93±7.38              | 40.43±6.68                   | 43.40±8.86                   | 44.04±9.86                   | 0.0009   |
| IVC, cm                                     | 2.27±0.49               | 2.01±0.52               | 2.30±0.44                    | 2.45±0.31                    | 2.51±0.54                    | <0.0001  |
| <i>Left heart</i>                           |                         |                         |                              |                              |                              |          |
| LVEF, %                                     | 60.0 [60.0–65.0]        | 60 [60.0–65.0]          | 60 [60.0–65.0]               | 60 [55.0–65.0]               | 60 [52.5–60.5]               | 0.0552   |

|                                                                             |                    |                   |                    |                     |                     |         |
|-----------------------------------------------------------------------------|--------------------|-------------------|--------------------|---------------------|---------------------|---------|
| LA diameter, mm                                                             | 41.98±6.86         | 39.78±6.35        | 40.65±6.51         | 43.17±6.12          | 48.56±5.85          | <0.0001 |
| LVEDD, mm                                                                   | 46.03±5.59         | 46.28±4.73        | 45.10±5.45         | 46.24±7.01          | 47.84±4.85          | 0.184   |
| E/e' ratio                                                                  | 12.98±5.34         | 11.07±3.52        | 12.96±4.12         | 13.80±6.52          | 16.42±8.07          | 0.0007  |
| <b>Renal function</b>                                                       |                    |                   |                    |                     |                     |         |
| Serum creatinine, mg/dL‡                                                    | 1.01±0.45          | 0.92±0.40         | 0.86±0.26          | 1.13±0.53           | 1.44±0.52           | <0.0001 |
| Cystatin C, mg/L                                                            | 1.10 [0.91–1.52]   | 0.98 [0.81–1.24]  | 1.06 [0.88–1.29]   | 1.33 [1.03–1.64]    | 1.83 [1.34–2.22]    | <0.0001 |
| Urea, mg/dL§                                                                | 47.44±35.85        | 40.97±26.71       | 37.12±17.31        | 59.84±56.61         | 72.72±32.68         | <0.0001 |
| eGFR (CKD-EPI creatinine equation), mL/min/1.73 m <sup>2</sup>              | 74.45±26.12        | 80.07±24.51       | 81.57±21.49        | 67.25±27.96         | 51.96±24.92         | <0.0001 |
| eGFR (CKD-EPI creatinine-cystatin C equation), mL/min/1.73 m <sup>2</sup> # | 68.58±26.86        | 77.68±27.65       | 74.42±21.81        | 59.42±25.85         | 45.24±23.37         | <0.0001 |
| Renal filtration gradient, mm Hg**                                          | 69.30±12.46        | 73.70±10.60       | 70.36±12.08        | 67.64±13.00         | 58.61±10.42         | <0.0001 |
| Urine PCR, mg/g creatinine                                                  | 58.8 [40.2–114.2]  | 51.5 [36.4–72.6]  | 55.3 [38.4–93.3]   | 70.3 [46.9–160.5]   | 116.2 [52.7–222.7]  | 0.0022  |
| Urine ACR, mg/g creatinine                                                  | 11.4 [6.3–29.7]    | 9.3 [5.2–16.0]    | 10.3 [6.2–22.2]    | 13.8 [8.1–45.8]     | 33.4 [11.3–223.7]   | <0.0001 |
| Urine $\alpha$ 1MCR, mg/g creatinine                                        | 10.9 [6.0–19.1]    | 8.7 [5.1–16.5]    | 10.4 [5.9–19.0]    | 11.7 [7.0–25.3]     | 16.3 [8.3–40.1]     | 0.0283  |
| Acanthocyturia, n (%)                                                       | 7 (3.4)            | 2 (3.4)           | 3 (3.9)            | 2 (4.5)             | 0 (0)               | 0.775   |
| Sterile leukocyturia, n (%)                                                 | 2 (1.0)            | 1 (1.7)           | 0 (0)              | 1 (2.3)             | 0 (0)               | 0.555   |
| <b>Renal Doppler ultrasonography</b>                                        |                    |                   |                    |                     |                     |         |
| RVSI                                                                        | 0.11 [0.00–0.32]   | 0 [0.0–0.0]       | 0.10 [0.07–0.14]   | 0.33 [0.20–0.41]    | 0.56 [0.48–0.74]    | <0.0001 |
| Venous impedance index                                                      | 0.84±0.26          | 0.44±0.12         | 1.00±0             | 1.00±0              | 1.00±0              | <0.0001 |
| RRI                                                                         | 0.71±0.07          | 0.69±0.08         | 0.70±0.07          | 0.74±0.06           | 0.75±0.06           | <0.0001 |
| <b>Neurohormonal status</b>                                                 |                    |                   |                    |                     |                     |         |
| BNP, pg/mL                                                                  | 138.0 [50.0–321.0] | 46.0 [26.0–113.0] | 150.0 [50.5–254.5] | 303.0 [147.0–633.8] | 534.0 [228.5–776.5] | <0.0001 |
| Copeptin, pmol/L                                                            | 11.1 [5.8–23.3]    | 9.1 [4.6–16.0]    | 7.9 [5.2–15.4]     | 18.8 [7.3–29.8]     | 27.7 [13.7–50.7]    | <0.0001 |
| Sodium, mmol/L                                                              | 139.56±3.07        | 139.32±3.15       | 139.57±2.80        | 140.59±2.86         | 138.24±3.60         | 0.0206  |
| Urine FeNa, %                                                               | 0.6 [0.4–1.3]      | 0.7 [0.4–1.2]     | 0.6 [0.4–1.1]      | 0.5 [0.4–1.5]       | 1.3 [0.5–2.5]       | 0.073   |
| BUN-to-creatinine ratio                                                     | 21.15±7.53         | 20.48±7.14        | 20.16±6.52         | 20.35±9.39          | 23.63±7.22          | 0.131   |
| Aldosterone, ng/dL                                                          | 5.60 [3.1–11.8]    | 4.90 [3.0–8.6]    | 4.90 [3.0–13.4]    | 6.15 [3.0–11.7]     | 10.50 [4.2–19.1]    | 0.0531  |
| Potassium, mmol/L                                                           | 3.67±0.42          | 3.65±0.40         | 3.65±0.41          | 3.77±0.453          | 3.66±0.42           | 0.591   |
| Urine Na/K ratio                                                            | 3.23±2.24          | 3.84±2.58         | 3.20±2.28          | 2.68±1.47           | 2.88±2.17           | 0.0532  |
| <b>Hydration status</b>                                                     |                    |                   |                    |                     |                     |         |
| Ascites, n (%)                                                              | 7 (3.4)            | 0 (0)             | 1 (1.3)            | 0 (0)               | 6 (24.0)            | <0.0001 |
| Pleural effusion, n (%)                                                     | 17 (8.3)           | 3 (5.1)           | 5 (6.5)            | 2 (4.5)             | 7 (28.0)            | 0.0021  |
| Peripheral edema, n (%)                                                     | 60 (29.3)          | 12 (22.0)         | 22 (28.6)          | 15 (34.1)           | 10 (40.0)           | 0.335   |
| Hydration status (as measured by bioimpedance), L                           | 0.71±2.12          | -0.14±1.41        | 0.78±2.24          | 1.16±2.09           | 1.70±2.55           | 0.0006  |
| Total body water, L                                                         | 37.78±7.47         | 37.93±8.71        | 36.78±6.99         | 39.46±7.20          | 37.73±5.86          | 0.359   |
| ECW, L                                                                      | 17.55±3.30         | 17.36±3.79        | 16.94±3.01         | 18.50±3.38          | 18.31±2.32          | 0.069   |
| ICW, L                                                                      | 20.28±4.53         | 20.56±5.24        | 19.85±4.43         | 20.97±4.24          | 19.83±3.32          | 0.574   |
| ECW/ICW ratio                                                               | 0.95±0.15          | 0.86±0.11         | 0.86±0.11          | 0.89±0.11           | 0.94±0.14           | 0.0204  |
| <b>Intra-abdominal pressure measurement</b>                                 |                    |                   |                    |                     |                     |         |
| Intra-abdominal pressure, mm Hg                                             | 7.0 [6.0–9.0]      | 6.0 [5.0–6.0]     | 7.0 [6.0–7.0]      | 9.0 [8.0–10.0]      | 11.0 [10.0–13.0]    | <0.0001 |
| Abdominal perfusion pressure, mm Hg††                                       | 76.78±11.81        | 79.46±10.38       | 77.04±12.09        | 76.67±12.96         | 69.85±9.67          | 0.0078  |

Values are mean±SD, median [interquartile range], or n (%).

\*After application of the Bonferroni correction,  $p < 0.0008$  was considered significant. †MAP was calculated as  $(\text{systolic blood pressure} + 2 \times \text{diastolic pressure}) / 3$ . ‡To convert the values for serum creatinine to  $\mu\text{mol/L}$ , multiply by 88.4. §eGFR was calculated with the CKD-EPI equation based on serum creatinine.<sup>23</sup> ¶To convert the values for urea to BUN, multiply by 0.467. #eGFR was calculated with the CKD-EPI equation based on serum creatinine and cystatin C.<sup>22</sup> \*\*The renal filtration gradient was calculated as:  $\text{MAP} - 2 \times \text{intra-abdominal pressure}$ .<sup>24</sup> ††The abdominal perfusion pressure was calculated using the equation:  $\text{MAP} - \text{intra-abdominal pressure}$ .<sup>24</sup>

6MWD=6-min walk distance; ACEi=angiotensin-converting enzyme inhibitor; ACR=albumin-to-creatinine ratio;  $\alpha 1\text{MCR} = \alpha 1$ -microglobulin-to-creatinine ratio; ARB=angiotensin receptor blocker; BUN=blood urea nitrogen; BNP=b-type natriuretic peptide; CKD-EPI=Chronic Kidney Disease Epidemiology Collaboration; ECW=extracellular water; E/e' ratio=ratio of mitral inflow velocity to lateral annular relaxation velocity; eGFR=estimated glomerular filtration rate; FeNa=fractional excretion of sodium; ICW=intracellular water; IVC=inferior vena cava; LA=left atrial; LVEDD=left ventricular end-diastolic diameter; LVEF=left ventricular ejection fraction; MAP=mean arterial pressure; Na/K=sodium/potassium; NYHA=New York Heart Association; PAP=pulmonary arterial pressure; PCR= protein-to-creatinine ratio; PCWP=pulmonary capillary wedge pressure; PH=pulmonary hypertension; PVR=pulmonary vascular resistance; RA=right atrial; RAP=right atrial pressure; RRI=renal resistive index; RV=right ventricular; RV S'=systolic annular tissue velocity of the lateral tricuspid annulus; RVSI=renal venous stasis index; TAPSE=tricuspid annular plane systolic excursion.



**Table S4. Additional data on clinical characteristics, invasive hemodynamics, echocardiographic data, renal function, neurohormonal and hydration status according to congestion stages as determined by renal venous stasis index.**

|                                   | All patients<br>(n=205) | RVSI=0<br>(n=59) | RVSI tertiles                  |                                     |                              | p value* |
|-----------------------------------|-------------------------|------------------|--------------------------------|-------------------------------------|------------------------------|----------|
|                                   |                         |                  | First<br>0<RVSI≤0.12<br>(n=49) | Second<br>>0.12<RVSI≤0.32<br>(n=48) | Third<br>RVSI>0.32<br>(n=49) |          |
| <b>Maintenance therapy, n (%)</b> |                         |                  |                                |                                     |                              |          |
| Calcium channel blocker           | 46 (22.4)               | 10 (16.9)        | 11 (22.4)                      | 14 (29.2)                           | 11 (22.4)                    | 0.518    |
| Thiazide diuretic                 | 72 (35.1)               | 18 (30.5)        | 18 (36.7)                      | 17 (35.4)                           | 19 (38.8)                    | 0.826    |
| Aldosterone antagonist            | 76 (37.1)               | 16 (27.1)        | 24 (49.0)                      | 12 (25.0)                           | 24 (49.0)                    | 0.0095   |
| Triamterene                       | 5 (2.4)                 | 0 (0)            | 2 (4.1)                        | 3 (6.3)                             | 0 (0)                        | 0.103    |
| <b>Renal function, n (%)</b>      |                         |                  |                                |                                     |                              |          |
| Acanthocyturia                    | 7 (3.4)                 | 2 (3.4)          | 2 (4.1)                        | 1 (2.1)                             | 2 (4.1)                      | 0.942    |
| Sterile leukocyturia              | 2 (1.0)                 | 1 (1.7)          | 0 (0)                          | 0 (0)                               | 1 (2.0)                      | 0.605    |
| <b>Neurohormonal status</b>       |                         |                  |                                |                                     |                              |          |
| BUN-to-creatinine ratio           | 21.15±7.53              | 20.48±7.14       | 20.38±6.60                     | 20.78±6.93                          | 23.06±9.14                   | 0.236    |
| Aldosterone, ng/dL                | 5.60 [3.1–11.8]         | 4.9 [3.0–8.6]    | 5.9 [3.0–13.5]                 | 4.7 [3.0–11.8]                      | 7.2 [4.1–16.7]               | 0.0292   |
| Urine Na/K ratio                  | 3.23±2.24               | 3.84±2.58        | 3.34±2.35                      | 2.87±1.76                           | 2.76±1.98                    | 0.0470   |
| <b>Hydration status, n (%)</b>    |                         |                  |                                |                                     |                              |          |
| Total body water, L               | 37.78±7.47              | 37.93±8.71       | 36.50±7.30                     | 37.82±6.19                          | 38.92±7.11                   | 0.495    |
| Extracellular water, L            | 17.55±3.30              | 17.36±3.79       | 16.62±2.95                     | 17.80±3.17                          | 18.54±2.87                   | 0.0450   |
| Intracellular water, L            | 20.28±4.53              | 20.56±5.24       | 19.88±4.66                     | 20.03±3.64                          | 20.62±4.27                   | 0.812    |

Values are mean±SD, median [interquartile range], or n (%).

\*After application of the Bonferroni correction, p<0.004 was considered significant.

BUN=blood urea nitrogen; Na/K=sodium/potassium; PH=pulmonary hypertension; RVSI=renal venous stasis index.

**Table S5. Correlation of RVSI with relevant parameters\*.**

|                                                | <b>RVSI<br/>Correlation coefficient</b> | <b>p value†</b> |
|------------------------------------------------|-----------------------------------------|-----------------|
| <b>Demographics</b>                            |                                         |                 |
| Age                                            | 0.238                                   | 0.0006          |
| Body mass index                                | - 0.025                                 | 0.720           |
| <b>Clinical variables</b>                      |                                         |                 |
| 6MWD                                           | - 0.239                                 | 0.0006          |
| Loop diuretic dose                             | 0.369                                   | <0.0001         |
| <b>Hemodynamics</b>                            |                                         |                 |
| Mean PAP                                       | 0.472                                   | <0.0001         |
| PVR                                            | 0.321                                   | <0.0001         |
| RAP                                            | 0.584                                   | <0.0001         |
| Cardiac index                                  | - 0.321                                 | <0.0001         |
| PCWP                                           | 0.404                                   | <0.0001         |
| Mixed venous oxygen saturation                 | - 0.391                                 | <0.0001         |
| <b>Echocardiographic parameters</b>            |                                         |                 |
| <i>Right heart</i>                             |                                         |                 |
| TAPSE                                          | - 0.456                                 | <0.0001         |
| RV myocardial performance index (Tei index)    | 0.037                                   | 0.672           |
| RV S'                                          | - 0.357                                 | <0.0001         |
| TAPSE/Systolic PAP ratio                       | - 0.332                                 | <0.0001         |
| RA area                                        | 0.471                                   | <0.0001         |
| RV diameter                                    | 0.272                                   | <0.0001         |
| IVC                                            | 0.355                                   | <0.0001         |
| <i>Left heart</i>                              |                                         |                 |
| LVEF                                           | - 0.163                                 | 0.0201          |
| LA diameter                                    | 0.404                                   | <0.0001         |
| E/e' ratio                                     | 0.250                                   | 0.0006          |
| <b>Renal function</b>                          |                                         |                 |
| Serum creatinine                               | 0.394                                   | <0.0001         |
| Urea                                           | 0.427                                   | <0.0001         |
| Cystatin C                                     | 0.462                                   | <0.0001         |
| eGFR (MDRD equation) ‡                         | - 0.365                                 | <0.0001         |
| eGFR (CKD-EPI creatinine equation)§            | - 0.365                                 | <0.0001         |
| eGFR (CKD-EPI creatinine-cystatin C equation)  | - 0.433                                 | <0.0001         |
| Renal filtration gradient#                     | - 0.327                                 | <0.0001         |
| Urine PCR                                      | 0.315                                   | <0.0001         |
| Urine ACR                                      | 0.341                                   | <0.0001         |
| Urine $\alpha$ 1MCR                            | 0.233                                   | 0.0008          |
| RRI                                            | 0.323                                   | <0.0001         |
| <b>Neurohormonal status</b>                    |                                         |                 |
| BNP                                            | 0.623                                   | <0.0001         |
| Copeptin                                       | 0.350                                   | <0.0001         |
| <b>Hydration status</b>                        |                                         |                 |
| Hydration status (as measured by bioimpedance) | 0.301                                   | <0.0001         |
| ECW/ICW ratio                                  | 0.178                                   | 0.0141          |
| <b>Intra-abdominal pressure measurement</b>    |                                         |                 |
| Intra-abdominal pressure                       | 0.772                                   | <0.0001         |
| Abdominal perfusion pressure**                 | - 0.214                                 | 0.0021          |

Pearson or Spearman correlation was considered as appropriate. \*Relevant parameters were chosen based on their clinical role; in addition, parameters that showed a significant difference across RVSI tertiles (table 2) were included. †After application of the Bonferroni correction,  $p < 0.0014$  was considered significant. ‡eGFR was calculated with the MDRD equation based on serum creatinine.<sup>25</sup> §eGFR was calculated with the CKD-EPI equation based on serum creatinine.<sup>23</sup> ||eGFR was calculated with the CKD-EPI equation based on serum creatinine and cystatin C.<sup>22</sup> #The renal filtration gradient was calculated as:  $MAP - 2 \times \text{intra-abdominal pressure}$ .<sup>24</sup> \*\*The abdominal perfusion pressure was calculated using the equation:  $MAP - \text{intra-abdominal pressure}$ .<sup>24</sup>

6MWD=6-min walk distance; ACR=albumin-to-creatinine ratio;  $\alpha$ 1MCR= $\alpha$ 1-microglobulin-to-creatinine ratio; CKD-EPI=Chronic Kidney Disease Epidemiology Collaboration; BNP=b-type natriuretic peptide; ECW=extracellular water; E/e' ratio=ratio of mitral inflow velocity to lateral annular relaxation velocity; eGFR=estimated glomerular filtration rate; ICW=intracellular water; IVC=inferior vena cava; LA=left atrial; LVEF=left ventricular ejection fraction; MAP=mean arterial pressure; MDRD=Modification of Diet in Renal Disease; PAP=pulmonary arterial pressure; PCR=protein-to-creatinine ratio; PCWP=pulmonary capillary wedge pressure; PVR=pulmonary vascular resistance; RA=right atrial; RAP=right atrial pressure; RRI=renal resistive index; RV=right ventricular; RV S'=systolic annular tissue velocity of the lateral tricuspid annulus; RVSI=renal venous stasis index; TAPSE=tricuspid annular plane systolic excursion.

**Table S6. Correlation of renal function with relevant parameters\*.**

|                                                 | Serum creatinine<br>Correlation<br>coefficient | p value† | eGFR (CKD-EPI<br>creatinine-cystatin C<br>equation)<br>Correlation coefficient | p value† |
|-------------------------------------------------|------------------------------------------------|----------|--------------------------------------------------------------------------------|----------|
| <b>Demographics</b>                             |                                                |          |                                                                                |          |
| Age, yrs                                        | 0.342                                          | <0.0001  | -0.542                                                                         | <0.0001  |
| <b>Baseline clinical data</b>                   |                                                |          |                                                                                |          |
| PaO <sub>2</sub> ‡                              | -0.021                                         | 0.764    | 0.028                                                                          | 0.685    |
| PaCO <sub>2</sub> ‡                             | 0.005                                          | 0.944    | 0.053                                                                          | 0.451    |
| 6MWD                                            | -0.211                                         | 0.0023   | 0.350                                                                          | <0.0001  |
| <b>Laboratory data</b>                          |                                                |          |                                                                                |          |
| Hemoglobin                                      | -0.166                                         | 0.0173   | 0.258                                                                          | 0.0002   |
| Uric acid                                       | 0.479                                          | <0.0001  | -0.510                                                                         | <0.0001  |
| C-reactive protein                              | 0.213                                          | 0.0022   | -0.282                                                                         | <0.0001  |
| <b>Maintenance therapy</b>                      |                                                |          |                                                                                |          |
| Loop diuretic dose                              | 0.482                                          | <0.0001  | -0.389                                                                         | <0.0001  |
| <b>Hemodynamics</b>                             |                                                |          |                                                                                |          |
| RAP                                             | 0.293                                          | <0.0001  | -0.323                                                                         | <0.0001  |
| PCWP                                            | 0.265                                          | <0.0001  | -0.270                                                                         | <0.0001  |
| Mixed venous oxygen saturation                  | -0.249                                         | <0.0001  | 0.312                                                                          | <0.0001  |
| <b>Echocardiographic parameters</b>             |                                                |          |                                                                                |          |
| TAPSE                                           | -0.315                                         | <0.0001  | 0.300                                                                          | <0.0001  |
| RV myocardial performance index (Tei index)     | -0.011                                         | 0.901    | 0.062                                                                          | 0.092    |
| RV S'                                           | -0.176                                         | 0.012    | 0.126                                                                          | 0.073    |
| TAPSE/Systolic PAP ratio                        | -0.168                                         | 0.016    | 0.258                                                                          | <0.0001  |
| RA area                                         | 0.342                                          | <0.0001  | -0.333                                                                         | <0.0001  |
| LA diameter                                     | 0.310                                          | <0.0001  | 0.310                                                                          | <0.0001  |
| <b>Renal function</b>                           |                                                |          |                                                                                |          |
| Renal filtration gradient                       | -0.279                                         | <0.0001  | 0.283                                                                          | <0.0001  |
| Urine PCR                                       | 0.180                                          | 0.0099   | -0.240                                                                         | 0.0005   |
| Urine ACR                                       | 0.179                                          | 0.0104   | -0.238                                                                         | 0.0006   |
| Urine α1MCR                                     | 0.397                                          | <0.0001  | -0.523                                                                         | <0.0001  |
| <b>Renal Doppler<br/>Ultrasonography</b>        |                                                |          |                                                                                |          |
| RRI                                             | 0.237                                          | <0.0001  | -0.430                                                                         | <0.0001  |
| RVSI                                            | 0.486                                          | <0.0001  | -0.433                                                                         | <0.0001  |
| <b>Neurohormonal status</b>                     |                                                |          |                                                                                |          |
| BNP                                             | 0.343                                          | <0.0001  | -0.416                                                                         | <0.0001  |
| Copeptin                                        | 0.554                                          | <0.0001  | -0.599                                                                         | <0.0001  |
| Urine FeNa                                      | 0.447                                          | <0.0001  | -0.492                                                                         | <0.0001  |
| <b>Hydration status</b>                         |                                                |          |                                                                                |          |
| ECW/ICW ratio                                   | 0.085                                          | 0.246    | -0.261                                                                         | 0.0003   |
| <b>Intra-abdominal pressure<br/>measurement</b> |                                                |          |                                                                                |          |
| Intra-abdominal pressure                        | 0.333                                          | <0.0001  | -0.327                                                                         | <0.0001  |

Pearson or Spearman correlation was considered as appropriate. \*All available study variables were included in the analysis, but only variables that were significant in the analysis are presented here; in addition, paO<sub>2</sub> and paCO<sub>2</sub> are presented based on their clinical role. †After application of the Bonferroni correction, p<0.0006 was considered significant. ‡Blood gas measurements were taken from arterialized capillary ear lobe blood during right heart catheterization. In patients with long-term oxygen treatment, oxygen was applied via nasal cannula at the previously prescribed flow rate.

6MWD=6-min walk distance; ACR=albumin-to-creatinine ratio; α1MCR=α1-microglobulin-to-creatinine ratio; BNP=b-type natriuretic peptide; CKD-EPI=Chronic Kidney Disease Epidemiology Collaboration; ECW=extracellular water; E/e' ratio=ratio of mitral inflow velocity to lateral annular relaxation velocity; eGFR=estimated glomerular filtration rate; FeNa=fractional excretion of sodium; ICW=intracellular water; LA=left atrial; LVEF=left ventricular ejection fraction; MAP=mean arterial pressure; PaCO<sub>2</sub>=arterial carbon dioxide pressure; PaO<sub>2</sub>=arterial oxygen pressure; PAP=pulmonary arterial pressure; PCR=protein-to-creatinine

ratio; PCWP=pulmonary capillary wedge pressure; RA=right atrial; RAP=right atrial pressure; RV=right ventricular; RV S'=systolic annular tissue velocity of the lateral tricuspid annulus; RVSI=renal venous stasis index; TAPSE=tricuspid annular plane systolic excursion.

**Table S7. Clinical characteristics, invasive hemodynamics, echocardiographic data, renal function, and neurohormonal and hydration status according to PH groups**

|                                     | No PH<br>(n=40)    | Group 1 PH<br>(pulmonary arterial<br>hypertension)<br>(n=46) | Group 2 PH<br>(PH due to left<br>heart disease)<br>(n=30) | Group 3 PH<br>(PH due to lung<br>disease and/or<br>hypoxemia)<br>(n=41) | Group 4 PH<br>(chronic<br>thromboembolic<br>PH)<br>(n=34) | Group 5 PH<br>(PH with unclear<br>multifactorial<br>mechanisms)<br>(n=14) | p value* |
|-------------------------------------|--------------------|--------------------------------------------------------------|-----------------------------------------------------------|-------------------------------------------------------------------------|-----------------------------------------------------------|---------------------------------------------------------------------------|----------|
| <b>Baseline clinical data</b>       |                    |                                                              |                                                           |                                                                         |                                                           |                                                                           |          |
| Oxygen supply, n (%)                |                    | 27 (58.7)                                                    | 13 (43.3)                                                 | 35 (85.4)                                                               | 17 (50.0)                                                 | 14 (100)                                                                  | <0.0001  |
| 6MWD, m                             | 313.15±126.56      | 309.07±153.40                                                | 269.60±115.46                                             | 199.12±105.30                                                           | 308.38±147.46                                             | 239.43±104.40                                                             | <0.0001  |
| NYHA classification, n (%)          |                    |                                                              |                                                           |                                                                         |                                                           |                                                                           | 0.0054   |
| 1–2                                 | 10 (25)            | 17 (37.0)                                                    | 5 (16.7)                                                  | 3 (7.3)                                                                 | 8 (23.5)                                                  | 1 (7.1)                                                                   |          |
| 3–4                                 | 30 (75)            | 29 (63.0)                                                    | 25 (83.3)                                                 | 38 (92.7)                                                               | 26 (76.5)                                                 | 13 (92.9)                                                                 |          |
| <b>Comorbidities, n (%)</b>         |                    |                                                              |                                                           |                                                                         |                                                           |                                                                           |          |
| Hypertension                        | 23 (57.5)          | 21 (45.7)                                                    | 27 (90.0)                                                 | 32 (78.0)                                                               | 18 (52.9)                                                 | 7 (50.0)                                                                  | <0.0001  |
| Diabetes mellitus                   | 8 (20.0)           | 8 (17.4)                                                     | 11 (36.7)                                                 | 11 (26.8)                                                               | 6 (17.6)                                                  | 4 (28.6)                                                                  | 0.388    |
| Atrial fibrillation                 | 10 (25.0)          | 7 (15.2)                                                     | 24 (80.0)                                                 | 6 (14.6)                                                                | 7 (20.6)                                                  | 2 (14.3)                                                                  | <0.0001  |
| <b>Maintenance therapy</b>          |                    |                                                              |                                                           |                                                                         |                                                           |                                                                           |          |
| ACEi or ARB, n (%)                  | 18 (45.0)          | 12 (26.1)                                                    | 21 (70.0)                                                 | 18 (43.9)                                                               | 9 (26.5)                                                  | 5 (35.7)                                                                  | 0.0027   |
| Loop diuretic dose, mg/day          | 0.0 [0.0–35.0]     | 40.0 [0.0–65.0]                                              | 50.0 [20.0–90.0]                                          | 40.0 [0.0–50.0]                                                         | 40.0 [0.0–80.0]                                           | 40.0 [0.0–80.0]                                                           | 0.0017   |
| Thiazide diuretic, n (%)            | 9 (22.5)           | 18 (39.1)                                                    | 11 (36.7)                                                 | 17 (41.5)                                                               | 12 (35.3)                                                 | 5 (35.7)                                                                  | 0.567    |
| Aldosterone antagonist, n (%)       | 8 (20.0)           | 22 (47.8)                                                    | 12 (40.0)                                                 | 13 (31.7)                                                               | 17 (50.0)                                                 | 4 (28.6)                                                                  | 0.0562   |
| Triamterene, n (%)                  | 0 (0)              | 3 (6.5)                                                      | 0 (0)                                                     | 0 (0)                                                                   | 1 (2.9)                                                   | 1 (7.1)                                                                   | 0.197    |
| <b>PH-specific therapy, n (%)</b>   |                    |                                                              |                                                           |                                                                         |                                                           |                                                                           | <0.0001  |
| Treatment-naïve                     | 40 (100)           | 10 (21.7)                                                    | 21 (70.0)                                                 | 22 (53.7)                                                               | 18 (52.9)                                                 | 5 (35.7)                                                                  |          |
| Monotherapy                         | 0 (0)              | 14 (30.4)                                                    | 9 (30)                                                    | 11 (26.8)                                                               | 10 (29.4)                                                 | 5 (35.7)                                                                  |          |
| Dual therapy                        | 0 (0)              | 14 (30.4)                                                    | 0 (0)                                                     | 6 (14.6)                                                                | 4 (11.7)                                                  | 4 (28.6)                                                                  |          |
| ≥Triple therapy                     | 0 (0)              | 8 (17.4)                                                     | 0 (0)                                                     | 2 (4.9)                                                                 | 2 (5.9)                                                   | 0 (0)                                                                     |          |
| <b>Hemodynamics</b>                 |                    |                                                              |                                                           |                                                                         |                                                           |                                                                           |          |
| Mean PAP, mm Hg                     | 17.68±4.60         | 42.13±18.07                                                  | 37.90±12.03                                               | 35.63±9.31                                                              | 36.91±8.25                                                | 46.00±11.75                                                               | <0.0001  |
| PVR, dyn.s/cm <sup>5</sup>          | 151.5 [89.5–223.8] | 547.5 [343.8–786.5]                                          | 315.5 [166.3–478.5]                                       | 486.0 [344.5–707.5]                                                     | 454.5 [334.0–632.5]                                       | 519.5 [475.0–613.5]                                                       | <0.0001  |
| RAP, mm Hg                          | 2.75±4.74          | 5.24±5.61                                                    | 9.97±6.08                                                 | 5.29±5.55                                                               | 5.53±5.05                                                 | 8.93±5.44                                                                 | <0.0001  |
| Cardiac index, L/min/m <sup>2</sup> | 3.10±1.41          | 2.69±0.80                                                    | 2.68±0.92                                                 | 2.47±0.67                                                               | 2.56±0.64                                                 | 2.99±1.31                                                                 | 0.0533   |
| PCWP, mm Hg                         | 7.0 [4.0–10.0]     | 8.5 [5.0–11.3]                                               | 19.0 [12.8–24.3]                                          | 7.0 [4.5–10.0]                                                          | 8.0 [5.0–11.3]                                            | 12.0 [8.5–15.3]                                                           | <0.0001  |
| Mixed venous oxygen saturation, %   | 67.65±7.01         | 64.69±8.81                                                   | 61.91±8.81                                                | 62.69±7.05                                                              | 60.73±8.72                                                | 64.05±8.51                                                                | 0.0083   |
| Heart rate, beats/min               | 71.45±11.11        | 70.39±11.46                                                  | 66.13±12.01                                               | 73.98±12.91                                                             | 72.15±13.56                                               | 97.71±21.30                                                               | 0.0306   |
| MAP, mm Hg†                         | 86.28±10.54        | 81.28±10.42                                                  | 82.94±10.16                                               | 84.91±13.16                                                             | 82.58±13.07                                               | 84.52±10.88                                                               | 0.191    |

| <b>Echocardiographic parameters</b>                                         |                  |                   |                   |                   |                   |                   |         |
|-----------------------------------------------------------------------------|------------------|-------------------|-------------------|-------------------|-------------------|-------------------|---------|
| <i>Right heart</i>                                                          |                  |                   |                   |                   |                   |                   |         |
| TAPSE, mm                                                                   | 21.45±4.83       | 20.22±4.25        | 18.07±4.09        | 19.07±4.02        | 19.82±3.55        | 20.86±2.77        | 0.0269  |
| RV myocardial performance index (Tei index)                                 | 0.40±0.19        | 0.52±0.22         | 0.43±0.19         | 0.54±0.22         | 0.52±0.25         | 0.49±0.27         | 0.237   |
| RV S', cm/s                                                                 | 12.40±3.88       | 11.76 ±3.71       | 10.62±3.37        | 10.71±3.13        | 11.91±3.27        | 12.79±3.30        | 0.112   |
| TAPSE/Systolic PAP ratio                                                    | 0.67±0.24        | 0.31±0.15         | 0.32±0.11         | 0.33±0.16         | 0.35±0.15         | 0.32±0.10         | <0.0001 |
| Tricuspid insufficiency                                                     |                  |                   |                   |                   |                   |                   | 0.159   |
| Mild                                                                        | 23 (57.5)        | 14 (30.4)         | 6 (20.0)          | 14 (34.1)         | 8 (23.5)          | 3 (21.4)          |         |
| Moderate                                                                    | 12 (30.0)        | 22 (47.8)         | 14 (46.7)         | 15 (36.6)         | 16 (47.1)         | 4 (28.6)          |         |
| Severe                                                                      | 5 (12.5)         | 10 (21.7)         | 10 (33.3)         | 12 (29.2)         | 10 (29.4)         | 7 (50)            |         |
| RA area, m <sup>2</sup>                                                     | 15.15±6.47       | 18.42±6.56        | 20.70±6.93        | 19.25±6.62        | 20.78±6.00        | 21.85±5.58        | 0.0009  |
| RV diameter, mm                                                             | 36.43±7.88       | 42.13±8.29        | 40.31±8.02        | 42.20±8.24        | 41.21±6.16        | 44.57±7.86        | 0.0031  |
| IVC, cm                                                                     | 2.15±0.47        | 2.25±0.59         | 2.37±0.41         | 2.30±0.46         | 2.27±0.43         | 2.45±0.50         | 0.317   |
| <i>Left heart</i>                                                           |                  |                   |                   |                   |                   |                   |         |
| LVEF, %                                                                     | 60.0 [58.1–65.0] | 60.5 [60.0–65.0]  | 60.0 [55.0–65.0]  | 60.0 [60.0–65.0]  | 60.0 [60.0–65.0]  | 60.0 [60.0–65.0]  | 0.161   |
| LA diameter, mm                                                             | 40.87±7.60       | 40.70±6.90        | 47.47±6.40        | 40.89±6.08        | 40.44±5.40        | 43.69±5.22        | <0.0001 |
| LVEDD, mm                                                                   | 47.78±5.09       | 44.40±5.96        | 49.20±4.81        | 44.39±5.48        | 45.79±5.60        | 44.00±3.49        | <0.0001 |
| E/e' ratio                                                                  | 11.69±4.64       | 11.03±2.83        | 20.44±6.03        | 13.30±4.91        | 11.57±4.48        | 11.68±3.61        | <0.0001 |
| <b>Renal function</b>                                                       |                  |                   |                   |                   |                   |                   |         |
| Serum creatinine, mg/dL‡                                                    | 0.91±0.45        | 1.04±0.43         | 1.23±0.50         | 0.99±0.43         | 0.99±0.42         | 0.78±0.25         | 0.0175  |
| Cystatin C, mg/L                                                            | 0.97 [0.76–1.21] | 1.19 [0.93–1.50]  | 1.36 [1.10–1.98]  | 1.09 [0.94–1.73]  | 1.07 [0.88–1.52]  | 1.06 [0.98–1.22]  | 0.0032  |
| Urea, mg/dL§                                                                | 39.98±29.56      | 45.67±42.10       | 61.57±34.11       | 49.05±29.86       | 49.15±44.64       | 35.50±14.40       | 0.143   |
| eGFR (CKD-EPI creatinine equation), mL/min/1.73 m <sup>2</sup>              | 83.28±23.76      | 73.30±27.87       | 56.57±21.63       | 77.15±25.32       | 71.97±25.05       | 89.50±21.14       | <0.0001 |
| eGFR (CKD-EPI creatinine-cystatin C equation), mL/min/1.73 m <sup>2</sup> # | 80.60±27.39      | 67.46±27.24       | 50.77±20.19       | 69.30±26.56       | 66.91±26.29       | 78.07±19.50       | <0.0001 |
| Renal filtration gradient, mm Hg**                                          | 73.88±10.66      | 66.19±10.32       | 65.01±11.71       | 70.03±14.57       | 68.05±13.88       | 68.45±11.52       | 0.0288  |
| Urine PCR, mg/g creatinine                                                  | 54.3 [44.9–82.9] | 57.0 [35.9–106.3] | 57.7 [35.6–131.7] | 70.5 [46.7–146.2] | 50.2 [36.4–121.9] | 64.1 [44.8–111.9] | 0.443   |
| Urine ACR, mg/g creatinine                                                  | 11.6 [6.1–17.0]  | 9.2 [5.3–27.1]    | 12.1 [7.9–39.7]   | 11.5 [6.6–66.2]   | 11.7 [7.5–29.3]   | 16.0 [6.5–55.3]   | 0.442   |
| Urine α1MCR, mg/g creatinine                                                | 9.8 [15.9–18.6]  | 8.7 [4.9–17.6]    | 15.3 [9.3–27.9]   | 13.1 [5.6–34.5]   | 11.2 [4.7–22.0]   | 7.6 [6.2–11.5]    | 0.071   |
| Acanthocyturia, n (%)                                                       | 1 (2.5)          | 5 (10.9)          | 0 (0)             | 1 (2.4)           | 0 (0)             | 0 (0)             | 0.057   |
| Sterile leukocyturia, n (%)                                                 | 0 (0)            | 0 (0)             | 0 (0)             | 0 (0)             | 1 (2.9)           | 1 (7.1)           | 0.135   |

|                                                   |                    |                      |                      |                     |                     |                     |         |
|---------------------------------------------------|--------------------|----------------------|----------------------|---------------------|---------------------|---------------------|---------|
| <b>Intrarenal Doppler Ultrasonography</b>         |                    |                      |                      |                     |                     |                     |         |
| Congestion stage                                  |                    |                      |                      |                     |                     |                     | <0.0001 |
| 0                                                 | 27 (67.5)          | 10 (21.7)            | 1 (3.3)              | 1 (24.4)            | 9 (26.5)            | 2 (14.3)            |         |
| 1                                                 | 13 (32.5)          | 20 (43.5)            | 12 (40)              | 16 (39.0)           | 14 (41.2)           | 6 (42.9)            |         |
| 2                                                 | 0 (0)              | 11 (23.9)            | 7 (23.3)             | 10 (24.4)           | 9 (26.5)            | 4 (28.6)            |         |
| 3                                                 | 0 (0)              | 5 (10.9)             | 10 (33.3)            | 5 (12.2)            | 2 (5.9)             | 2 (14.3)            |         |
| Venous impedance index of 1.0                     | 13 (32.5)          | 36 (78.3)            | 29 (96.7)            | 31 (75.6)           | 25 (73.5)           | 12 (85.7)           | 0.482   |
| RVSI                                              | 0.0 [0.00-0.09]    | 0.13 [0.04-0.34]     | 0.27 [0.11-0.46]     | 0.09 [0.02-0.29]    | 0.12 [0.00-0.29]    | 0.15 [0.06-0.36]    | <0.0001 |
| RRI                                               | 0.67±0.05          | 0.71±0.07            | 0.76±0.06            | 0.71±0.08           | 0.73±0.07           | 0.71±0.07           | <0.0001 |
| <b>Neurohormonal status</b>                       |                    |                      |                      |                     |                     |                     |         |
| BNP, pg/mL                                        | 51.00 [22.5-175.5] | 134.00 [375.5-324.8] | 232.50 [157.5-590.0] | 114.00 [55.0-538.5] | 160.00 [98.5-314.5] | 196.00 [45.8-531.0] | <0.0001 |
| Copeptin, pmol/L                                  | 6.95 [4.2-13.5]    | 7.95 [5.2-18.9]      | 15.45 [6.4-39.2]     | 14.15 [8.0-27.7]    | 16.30 [6.8-23.1]    | 11.35 [6.1-20.1]    | 0.0063  |
| Urine FeNa, %                                     | 0.60 [0.4-1.1]     | 0.65 [0.3-1.4]       | 1.20 [0.6-1.9]       | 0.80 [0.4-1.3]      | 0.50 [0.3-1.4]      | 0.4 [0.3-0.5]       | 0.0162  |
| Sodium, mmol/L                                    | 139.33±3.24        | 139.24±3.14          | 139.90±2.90          | 139.66±3.03         | 139.47±3.52         | 140.50±1.51         | 0.783   |
| BUN-to-creatinine ratio                           | 20.28±8.18         | 19.09±6.80           | 23.05±7.86           | 22.58±7.22          | 21.47±7.84          | 21.29±6.46          | 0.189   |
| Aldosterone, ng/dL                                | 4.70 [3.00-8.45]   | 8.85 [3.90-19.88]    | 5.75 [3.00-10.90]    | 4.70 [3.00-12.30]   | 6.30 [3.00-11.83]   | 4.65 [3.00-6.95]    | 0.079   |
| Potassium, mmol/L                                 | 3.75±0.45          | 3.61±0.39            | 3.78±0.45            | 3.60±0.43           | 3.62±0.40           | 3.67±0.25           | 0.271   |
| Urine Na/K ratio                                  | 3.52±2.31          | 2.80±1.70            | 3.61±2.65            | 3.45±2.54           | 3.04±2.16           | 2.90±1.94           | 0.53    |
| <b>Hydration status</b>                           |                    |                      |                      |                     |                     |                     |         |
| Ascites, n (%)                                    | 0 (0)              | 2 (4.3)              | 3 (10.0)             | 1 (2.4)             | 1 (2.9)             | 0 (0)               | 0.588   |
| Peripheral edema, n (%)                           | 9 (22.5)           | 14 (30.4)            | 9 (30.0)             | 12 (29.3)           | 11 (32.4)           | 5 (35.7)            | 0.929   |
| Pleural effusion, n (%)                           | 0 (0)              | 5 (10.9)             | 3 (10.0)             | 3 (7.3)             | 2 (5.9)             | 4 (28.6)            | 0.0346  |
| Hydration status (as measured by bioimpedance), L | 0.11±1.64          | 0.97±2.02            | 1.05±2.53            | 0.54±2.21           | 0.71±2.28           | 1.35±1.91           | 0.282   |
| Total body water, L                               | 38.46±7.26         | 36.13±7.81           | 37.73±6.31           | 38.85±8.35          | 37.76±7.91          | 38.16±5.58          | 0.679   |
| ECW, L                                            | 17.57±3.30         | 16.88±3.28           | 17.74±2.84           | 17.82±3.75          | 17.54±3.45          | 18.39±2.68          | 0.710   |
| ICW, L                                            | 20.88±4.31         | 19.51±4.53           | 19.97±4.01           | 20.03±5.12          | 20.22±4.93          | 19.76±3.37          | 0.669   |
| ECW/ICW ratio                                     | 0.85±0.09          | 0.87±0.12            | 0.90±0.12            | 0.86±0.13           | 0.88±0.13           | 0.94±0.11           | 0.132   |
| <b>Intra-abdominal pressure measurement</b>       |                    |                      |                      |                     |                     |                     |         |
| Intra-abdominal pressure, mm Hg                   | 6.0 [5.0-7.0]      | 7.0 [6.0-9.0]        | 8.5 [7.0-10.0]       | 7.0 [6.0-9.0]       | 7.0 [6.0-8.3]       | 8.0 [6.8-10.3]      | <0.0001 |
| Abdominal perfusion pressure, mm Hg <sup>††</sup> | 80.08±10.50        | 73.73±10.11          | 75.99±10.66          | 79.47±13.70         | 75.31±13.35         | 74.74±10.95         | 0.092   |

Values are mean±SD, median [interquartile range], or n (%).

\*After application of the Bonferroni correction,  $p < 0.0008$  was considered significant. †MAP was calculated as  $(\text{systolic blood pressure} + 2 \times \text{diastolic pressure}) / 3$ . ‡To convert the values for serum creatinine to  $\mu\text{mol/L}$ , multiply by 88.4. §To convert the values for urea to BUN, multiply by 0.467. ||eGFR was calculated with the CKD-EPI equation based on serum creatinine.<sup>23</sup> #eGFR was calculated with the CKD-EPI equation based on serum creatinine and cystatin C.<sup>22</sup> \*\*The renal filtration gradient was calculated as:  $\text{MAP} - 2 \times \text{intra-abdominal pressure}$ .<sup>24</sup> ††The abdominal perfusion pressure was calculated using the equation:  $\text{MAP} - \text{intra-abdominal pressure}$ .<sup>24</sup>

6MWD=6-min walk distance; ACEi=angiotensin-converting enzyme inhibitor; ACR=albumin-to-creatinine ratio;  $\alpha 1\text{MCR} = \alpha 1$ -microglobulin-to-creatinine ratio; ARB=angiotensin receptor blocker; BNP=b-type natriuretic peptide; BUN=blood urea nitrogen; CKD-EPI=Chronic Kidney Disease Epidemiology Collaboration; ECW=extracellular water; E/e' ratio=ratio of mitral inflow velocity to lateral annular relaxation velocity; eGFR=estimated glomerular filtration rate; FeNa=fractional excretion of sodium; ICW=intracellular water; IVC=inferior vena cava; LA=left atrial; LVEDD=left ventricular end-diastolic diameter; LVEF=left ventricular ejection fraction; MAP=mean arterial pressure; Na/K=sodium/potassium; NYHA=New York Heart Association; PAP=pulmonary arterial pressure; PCR=protein-to-creatinine ratio; PCWP=pulmonary capillary wedge pressure; PH=pulmonary hypertension; PVR=pulmonary vascular resistance; RA=right atrial; RAP=right atrial pressure; RRI=renal resistive index; RV=right ventricular; RV S'=systolic annular tissue velocity of the lateral tricuspid annulus; RVSII=renal venous stasis index; TAPSE=tricuspid annular plane systolic excursion.



**Table S8. Outcomes in the RHC cohort.**

| <b>Outcome, n (%)</b>                           | <b>RHC cohort (n=205)</b> |
|-------------------------------------------------|---------------------------|
| PH-related morbidity and death from any cause   | 91 (44.4%)                |
| Unscheduled hospitalizations for fluid overload | 64 (31.2%)                |
| Escalations of PH-specific therapy              | 71 (34.6%)                |
| Death from any cause                            | 21 (10.2%)                |

Five patients underwent pulmonary thrombendarterectomy, and one patient underwent lung transplantation.

RHC=right heart catheterization; PH=pulmonary hypertension.

**Table S9. Predictors of morbidity and mortality by the univariate Cox proportional hazard model.**

| Predictor                                      | Univariate          |         |
|------------------------------------------------|---------------------|---------|
|                                                | HR (95% CI)         | p value |
| <b>Baseline clinical data</b>                  |                     |         |
| Age                                            | 1.02 (1.00–1.03)    | 0.0439  |
| Sex                                            | 0.63 (0.42–0.95)    | 0.0265  |
| 6MWD                                           | 0.997 (0.996–0.999) | 0.0006  |
| NYHA classification                            | 1.62 (1.19–2.20)    | 0.0024  |
| Pulmonary hypertension group                   | 0.81 (0.72–0.91)    | <0.0001 |
| Diabetes mellitus                              | 1.88 (1.21–2.91)    | 0.0048  |
| Atrial fibrillation                            | 2.56 (1.68–3.88)    | <0.0001 |
| Uric acid                                      | 1.25 (1.16–1.34)    | <0.0001 |
| <b>Hemodynamics</b>                            |                     |         |
| Mean PAP                                       | 1.03 (1.02–1.04)    | <0.0001 |
| PVR                                            | 1.00 (1.00–1.00)    | <0.0001 |
| RAP                                            | 1.12 (1.07–1.14)    | <0.0001 |
| Cardiac index                                  | 0.54 (0.39–0.74)    | <0.0001 |
| PCWP                                           | 1.06 (1.03–1.09)    | <0.0001 |
| Mixed venous oxygen saturation                 | 0.93 (0.91–0.96)    | <0.0001 |
| <b>Echocardiographic parameters</b>            |                     |         |
| TAPSE                                          | 0.90 (0.86–0.94)    | <0.0001 |
| RV S'                                          | 0.86 (0.80–0.93)    | <0.0001 |
| TAPSE/Systolic PAP ratio                       | 0.05 (0.01–0.19)    | <0.0001 |
| Tricuspid insufficiency                        | 1.76 (1.32–2.35)    | <0.0001 |
| RA area                                        | 1.07 (1.04–1.09)    | <0.0001 |
| RV diameter                                    | 1.05 (1.02–1.07)    | <0.0001 |
| IVC diameter                                   | 2.08 (1.38–3.13)    | <0.0001 |
| LVEF                                           | 0.98 (0.95–1.00)    | 0.0477  |
| LA diameter                                    | 1.07 (1.04–1.10)    | <0.0001 |
| E/e' ratio                                     | 1.07 (1.03–1.11)    | <0.0001 |
| <b>Renal function</b>                          |                     |         |
| Serum creatinine                               | 2.59 (1.83–3.66)    | <0.0001 |
| Cystatin C                                     | 2.18 (1.69–2.82)    | <0.0001 |
| Urea                                           | 1.01 (1.01–1.02)    | <0.0001 |
| eGFR (MDRD equation)*                          | 0.99 (0.98–0.99)    | <0.0001 |
| eGFR (CKD-EPI creatinine equation) †           | 0.98 (0.97–0.98)    | <0.0001 |
| eGFR (CKD-EPI creatinine-cystatin C equation)‡ | 0.98 (0.97–0.99)    | <0.0001 |
| Renal filtration gradient                      | 0.97 (0.95–0.99)    | 0.0007  |
| Urine $\alpha$ 1MCR                            | 1.01 (1.01–1.02)    | <0.0001 |
| Urine FeNa                                     | 1.21 (1.09–1.34)    | <0.0001 |
| <b>Renal Doppler ultrasonography</b>           |                     |         |
| RVSI tertiles                                  | 20.57 (9.03–46.87)  | <0.0001 |
| 1 <sup>st</sup> tertile RVSI group vs RVSI=0   | 2.31 (1.06–5.05)    | 0.0363  |
| 2 <sup>nd</sup> tertile RVSI group vs RVSI=0   | 3.63 (1.71–7.65)    | 0.0007  |
| 3 <sup>rd</sup> tertile RVSI group vs RVSI=0   | 8.70 (4.33–17.48)   | <0.0001 |
| Congestion stages                              | 2.00 (1.63–2.44)    | <0.0001 |
| Stage 1 congestion vs stage 0                  | 2.65 (1.29–5.44)    | 0.0078  |
| Stage 2 congestion vs stage 0                  | 6.35 (3.08–13.09)   | <0.0001 |
| Stage 3 congestion vs stage 0                  | 8.45 (3.98–17.96)   | <0.0001 |
| Venous impedance index                         | 14.61 (4.31–49.55)  | <0.0001 |
| <b>Neurohormonal status</b>                    |                     |         |
| BNP                                            | 1.00 (1.00–1.00)    | <0.0001 |
| Copeptin                                       | 1.02 (1.02–1.03)    | <0.0001 |
| Aldosterone                                    | 1.01 (1.00–1.02)    | 0.0184  |
| <b>Hydration status</b>                        |                     |         |
| Hydration status (as measured by bioimpedance) | 1.14 (1.03–1.25)    | 0.0081  |
| Extracellular/intracellular water              | 8.42 (1.31–54.25)   | 0.0251  |
| Ascites                                        | 2.85 (1.30–6.23)    | 0.0089  |
| Pleural effusion                               | 2.27 (1.26–4.10)    | 0.0064  |
| <b>Intra-abdominal pressure measurement</b>    |                     |         |
| Intra-abdominal pressure                       | 1.25 (1.17–1.34)    | <0.0001 |
| Abdominal perfusion pressure§                  | 0.98 (0.96–1.00)    | 0.0226  |

All available study variables were included in the univariate analysis, but only variables that were significant in the univariate analysis are presented here. \*eGFR was calculated with the MDRD equation based on serum creatinine.<sup>25</sup> †eGFR was calculated with the CKD-EPI equation based on serum creatinine.<sup>23</sup> ‡eGFR was calculated with the CKD-EPI equation based on serum creatinine and cystatin C.<sup>22</sup> §The abdominal perfusion pressure was calculated using the equation: MAP–intra-abdominal pressure, while MAP was calculated as (systolic blood pressure+2x diastolic pressure)/3.<sup>24</sup>

6MWD=6-min walk distance;  $\alpha$ 1MCR= $\alpha$ 1-microglobulin-to-creatinine ratio; BNP=b-type natriuretic peptide; CKD-EPI=Chronic Kidney Disease Epidemiology Collaboration; CI=confidence interval; E/e' ratio=ratio of

mitral inflow velocity to lateral annular relaxation velocity; eGFR=estimated glomerular filtration rate; FeNa=fractional excretion of sodium; HR=hazard ratio; IVC=inferior vena cava; LA=left atrial; LVEF=left ventricular ejection fraction; MAP=mean arterial pressure; MDRD=Modification of Diet in Renal Disease; NYHA=New York Heart Association; PAP=pulmonary arterial pressure; PCWP=pulmonary capillary wedge pressure; PVR=pulmonary vascular resistance; RA=right atrial; RAP=right atrial pressure; RV=right ventricular; RV S'=systolic annular tissue velocity of the lateral tricuspid annulus; RVSI=renal venous stasis index; TAPSE=tricuspid annular plane systolic excursion.

**Table S10. Predictors of unscheduled hospitalization due to fluid overload by the univariate Cox proportional hazard model.**

| Predictor                                      | Univariate            |         |
|------------------------------------------------|-----------------------|---------|
|                                                | HR (95% CI)           | p value |
| <b>Baseline clinical data</b>                  |                       |         |
| Age                                            | 1.04 (1.01–1.06)      | 0.0013  |
| Sex                                            | 0.48 (0.29–0.79)      | 0.0039  |
| 6MWD                                           | 0.996 (0.994–0.998)   | <0.0001 |
| NYHA classification                            | 1.81 (1.24–2.64)      | 0.0022  |
| Pulmonary hypertension group                   | 0.83 (0.72–0.95)      | 0.0083  |
| Diabetes mellitus                              | 2.58 (1.56–4.27)      | <0.0001 |
| Atrial fibrillation                            | 4.05 (2.47–6.63)      | <0.0001 |
| Sodium                                         | 0.93 (0.86–0.99)      | 0.0286  |
| Uric acid                                      | 1.29 (1.19–1.41)      | <0.0001 |
| <b>Hemodynamics</b>                            |                       |         |
| Mean PAP                                       | 1.02 (1.01–1.04)      | 0.0008  |
| PVR                                            | 1.00 (1.00–1.00)      | 0.0246  |
| RAP                                            | 1.15 (1.11–1.20)      | <0.0001 |
| Cardiac index                                  | 0.46 (0.31–0.68)      | <0.0001 |
| PCWP                                           | 1.08 (1.05–1.11)      | <0.0001 |
| Mixed venous oxygen saturation                 | 0.92 (0.90–0.95)      | <0.0001 |
| <b>Echocardiographic parameters</b>            |                       |         |
| TAPSE                                          | 0.86 (0.81–0.91)      | <0.0001 |
| RV S'                                          | 0.77 (0.70–0.85)      | <0.0001 |
| TAPSE/Systolic PAP ratio                       | 0.02 (0.00–0.18)      | <0.0001 |
| Tricuspid insufficiency                        | 2.22 (1.55–3.18)      | <0.0001 |
| RA area                                        | 1.11 (1.07–1.14)      | <0.0001 |
| RV diameter                                    | 1.06 (1.03–1.10)      | <0.0001 |
| IVC diameter                                   | 2.60 (1.59–4.16)      | <0.0001 |
| LVEF                                           | 0.96 (0.94–0.99)      | 0.0037  |
| LA diameter                                    | 1.07 (1.04–1.11)      | <0.0001 |
| E/e' ratio                                     | 1.08 (1.03–1.12)      | <0.0001 |
| <b>Renal function</b>                          |                       |         |
| Serum creatinine                               | 3.40 (2.33–4.94)      | <0.0001 |
| Cystatin C                                     | 2.62 (1.99–3.45)      | <0.0001 |
| Urea                                           | 1.01 (1.01–1.02)      | <0.0001 |
| eGFR (MDRD equation)*                          | 0.98 (0.97–0.99)      | <0.0001 |
| eGFR (CKD-EPI creatinine equation) †           | 0.97 (0.96–0.98)      | <0.0001 |
| eGFR (CKD-EPI creatinine-cystatin C equation)‡ | 0.97 (0.96–0.98)      | <0.0001 |
| BUN-to-creatinine ratio                        | 1.04 (1.01–1.07)      | 0.0117  |
| Renal filtration gradient                      | 0.96 (0.94–0.98)      | <0.0001 |
| Urine $\alpha$ 1MCR                            | 1.01 (1.01–1.02)      | <0.0001 |
| Urine FeNa                                     | 1.21 (1.07–1.36)      | 0.0017  |
| <b>Renal Doppler ultrasonography</b>           |                       |         |
| RVSI tertiles                                  | 1.71 (1.48–1.98)      | <0.0001 |
| 1 <sup>st</sup> tertile RVSI group vs RVSI=0   | 6.49 (1.42–29.64)     | 0.0157  |
| 2 <sup>nd</sup> tertile RVSI group vs RVSI=0   | 10.98 (2.52–47.76)    | 0.0014  |
| 3 <sup>rd</sup> tertile RVSI group vs RVSI=0   | 35.60 (8.54–148.38)   | <0.0001 |
| Congestion stages                              | 2.49 (1.94–3.20)      | <0.0001 |
| Stage 1 congestion vs stage 0                  | 7.36 (1.71–31.72)     | 0.0074  |
| Stage 2 congestion vs stage 0                  | 25.51 (6.05–107.67)   | <0.0001 |
| Stage 3 congestion vs stage 0                  | 32.17 (7.44–139.09)   | <0.0001 |
| Venous impedance index                         | 121.10 (9.45–1552.61) | <0.0001 |
| <b>Neurohormonal status</b>                    |                       |         |
| BNP                                            | 1.00 (1.00–1.00)      | <0.0001 |
| Copeptin                                       | 1.03 (1.02–1.04)      | <0.0001 |
| Aldosterone                                    | 1.02 (1.00–1.03)      | 0.0122  |
| <b>Hydration status</b>                        |                       |         |
| Hydration status (as measured by bioimpedance) | 1.16 (1.04–1.29)      | 0.0089  |
| Extracellular/intracellular water              | 14.97 (1.66–135.09)   | 0.0159  |
| Extracellular water                            | 1.09 (1.01–1.18)      | 0.0280  |
| Ascites                                        | 3.11 (1.24–7.77)      | 0.0153  |
| Pleural effusion                               | 2.42 (1.19–4.90)      | 0.0142  |
| Peripheral edema                               | 2.09 (1.28–3.44)      | 0.0034  |
| <b>Intra-abdominal pressure measurement</b>    |                       |         |
| Intra-abdominal pressure                       | 1.36 (1.26–1.47)      | <0.0001 |
| Abdominal perfusion pressure§                  | 0.97 (0.95–1.00)      | 0.0210  |

All available study variables were included in the univariate analysis, but only variables that were significant in the univariate analysis are presented here. \*eGFR was calculated with the MDRD equation based on serum creatinine.<sup>25</sup> †eGFR was calculated with the CKD-EPI equation based on serum creatinine.<sup>23</sup> ‡eGFR was calculated with the CKD-EPI equation based on serum creatinine and cystatin C.<sup>22</sup> §The abdominal perfusion

pressure was calculated using the equation:  $\text{MAP} = \text{intra-abdominal pressure} + \frac{(\text{systolic blood pressure} + 2 \times \text{diastolic pressure})}{3}$ .<sup>24</sup>

6MWD=6-min walk distance;  $\alpha 1\text{MCR} = \alpha 1$ -microglobulin-to-creatinine ratio; BNP=b-type natriuretic peptide; BUN=blood urea nitrogen; CKD-EPI=Chronic Kidney Disease Epidemiology Collaboration; CI=confidence interval; E/e' ratio=ratio of mitral inflow velocity to lateral annular relaxation velocity; eGFR=estimated glomerular filtration rate; FeNa=fractional excretion of sodium; IVC=inferior vena cava; HR=hazard ratio; LA=left atrial; LVEF=left ventricular ejection fraction; MAP=mean arterial pressure; MDRD=Modification of Diet in Renal Disease; NYHA=New York Heart Association; PAP=pulmonary arterial pressure; PCR=protein-to-creatinine ratio; PCWP=pulmonary capillary wedge pressure; PVR=pulmonary vascular resistance; RA=right atrial; RAP = right atrial pressure; RV=right ventricular; RV S'=systolic annular tissue velocity of the lateral tricuspid annulus; RVSI=renal venous stasis index; TAPSE=tricuspid annular plane systolic excursion.

**Table S11. Predictors of escalation of PH-specific therapy by the univariate Cox proportional hazard model.**

| Predictor                                       | Univariate          |         |
|-------------------------------------------------|---------------------|---------|
|                                                 | HR (95% CI)         | p value |
| <b>Baseline clinical data</b>                   |                     |         |
| 6MWD                                            | 0.997 (0.995–0.999) | 0.0013  |
| NYHA classification                             | 1.59 (1.11–2.27)    | 0.0110  |
| Pulmonary hypertension group                    | 0.79 (0.69–0.91)    | 0.0008  |
| Diabetes mellitus                               | 1.90 (1.16–3.12)    | 0.0105  |
| Atrial fibrillation                             | 1.79 (1.11–2.89)    | 0.0177  |
| Potassium                                       | 0.49 (0.28–0.88)    | 0.0162  |
| Uric acid                                       | 1.26 (1.16–1.36)    | <0.0001 |
| <b>Hemodynamics</b>                             |                     |         |
| Mean PAP                                        | 1.03 (1.02–1.04)    | <0.0001 |
| PVR                                             | 1.00 (1.00–1.00)    | <0.0001 |
| RAP                                             | 1.08 (1.04–1.12)    | <0.0001 |
| Cardiac index                                   | 0.41 (0.28–0.60)    | <0.0001 |
| PCWP                                            | 1.04 (1.01–1.07)    | 0.0072  |
| Mixed venous oxygen saturation                  | 0.92 (0.90–0.95)    | <0.0001 |
| <b>Echocardiographic parameters</b>             |                     |         |
| TAPSE                                           | 0.89 (0.85–0.94)    | <0.0001 |
| RV S'                                           | 0.84 (0.77–0.91)    | <0.0001 |
| TAPSE/Systolic PAP ratio                        | 0.04 (0.01–0.21)    | <0.0001 |
| Tricuspid insufficiency                         | 1.54 (1.12–2.12)    | 0.0079  |
| RA area                                         | 1.05 (1.02–1.09)    | 0.0013  |
| RV diameter                                     | 1.05 (1.02–1.08)    | 0.0005  |
| IVC diameter                                    | 2.00 (1.25–3.19)    | 0.0037  |
| LA diameter                                     | 1.05 (1.01–1.08)    | 0.0072  |
| LVEDD                                           | 0.95 (0.91–0.99)    | 0.0221  |
| E/e' ratio                                      | 1.07 (1.03–1.12)    | 0.0006  |
| <b>Renal function</b>                           |                     |         |
| Serum creatinine                                | 2.55 (1.74–3.73)    | <0.0001 |
| Urea                                            | 1.01 (1.00–1.01)    | <0.0001 |
| Cystatin C                                      | 1.95 (1.50–2.55)    | <0.0001 |
| eGFR (MDRD equation)*                           | 0.99 (0.98–0.99)    | <0.0001 |
| eGFR (CKD-EPI creatinine equation) †            | 0.98 (0.97–0.99)    | <0.0001 |
| eGFR (CKD-EPI creatinine-cystatin C equation) ‡ | 0.98 (0.97–0.99)    | <0.0001 |
| Renal filtration gradient                       | 0.96 (0.94–0.99)    | 0.0007  |
| Urine $\alpha$ 1MCR                             | 1.01 (1.01–1.02)    | <0.0001 |
| Urine FeNa                                      | 1.24 (1.10–1.39)    | <0.0001 |
| <b>Renal Doppler ultrasonography</b>            |                     |         |
| RVSI tertiles                                   | 1.43 (1.26–1.63)    | <0.0001 |
| 1 <sup>st</sup> tertile RVSI group vs RVSI=0    | 2.16 (0.89–5.24)    | 0.0872  |
| 2 <sup>nd</sup> tertile RVSI group vs RVSI=0    | 3.52 (1.53–8.07)    | 0.0030  |
| 3 <sup>rd</sup> tertile RVSI group vs RVSI=0    | 7.03 (3.22–15.35)   | <0.0001 |
| Congestion stages                               | 1.86 (1.49–2.33)    | <0.0001 |
| Stage 1 congestion vs stage 0                   | 2.37 (1.05–5.35)    | 0.0373  |
| Stage 2 congestion vs stage 0                   | 6.22 (2.79–13.87)   | <0.0001 |
| Stage 3 congestion vs stage 0                   | 6.39 (2.73–14.97)   | <0.0001 |
| Venous impedance index                          | 12.59 (3.20–49.45)  | <0.0001 |
| <b>Neurohormonal status</b>                     |                     |         |
| BNP                                             | 1.00 (1.00–1.00)    | <0.0001 |
| Copeptin                                        | 1.03 (1.02–1.04)    | <0.0001 |
| <b>Hydration status</b>                         |                     |         |
| Pleural effusion                                | 2.15 (1.10–4.21)    | 0.0256  |
| <b>Intra-abdominal pressure measurement</b>     |                     |         |
| Intra-abdominal pressure                        | 1.22 (1.13–1.32)    | <0.0001 |
| Abdominal perfusion pressure§                   | 0.97 (0.95–0.99)    | 0.0098  |

All available study variables were included in the univariate analysis, but only variables that were significant in the univariate analysis are presented here. \*eGFR was calculated with the MDRD equation based on serum creatinine.<sup>25</sup> †eGFR was calculated with the CKD-EPI equation based on serum creatinine.<sup>23</sup> ‡eGFR was calculated with the CKD-EPI equation based on serum creatinine and cystatin C.<sup>22</sup> §The abdominal perfusion pressure was calculated using the equation: MAP–intra-abdominal pressure, while MAP was calculated as (systolic blood pressure+2x diastolic pressure)/3.<sup>24</sup>

6MWD=6-min walk distance;  $\alpha$ 1MCR= $\alpha$ 1-microglobulin-to-creatinine ratio; BNP=b-type natriuretic peptide; CKD-EPI=Chronic Kidney Disease Epidemiology Collaboration; CI=confidence interval; E/e' ratio=ratio of mitral inflow velocity to lateral annular relaxation velocity; eGFR=estimated glomerular filtration rate; FeNa=fractional excretion of sodium; HR=hazard ratio; IVC=inferior vena cava; LA=left atrial; LVEDD=left ventricular end-diastolic diameter; MAP=mean arterial pressure; MDRD=Modification of Diet in Renal Disease;

NYHA=New York Heart Association; PAP=pulmonary arterial pressure; PCWP=pulmonary capillary wedge pressure; PH=pulmonary hypertension; PVR=pulmonary vascular resistance; RA=right atrial; RAP=right atrial pressure; RV=right ventricular; RV S'=systolic annular tissue velocity of the lateral tricuspid annulus; RVSI=renal venous stasis index; TAPSE=tricuspid annular plane systolic excursion.

**Table S12. Predictors of death from any cause by the univariate Cox proportional hazard model.**

| Predictor                                    | Univariate        |         |
|----------------------------------------------|-------------------|---------|
|                                              | HR (95% CI)       | p value |
| <b>Baseline clinical data</b>                |                   |         |
| Sex                                          | 0.30 (0.12–0.77)  | 0.0127  |
| 6MWD                                         | 1.0 (0.99–1.00)   | 0.0239  |
| NYHA classification                          | 2.65 (1.30–5.41)  | 0.0074  |
| Uric acid                                    | 1.25 (1.09–1.43)  | 0.0018  |
| <b>Hemodynamics</b>                          |                   |         |
| RAP                                          | 1.08 (1.02–1.15)  | 0.0149  |
| Mixed venous oxygen saturation               | 0.92 (0.88–0.96)  | <0.0001 |
| <b>Echocardiographic parameters</b>          |                   |         |
| TAPSE                                        | 0.88 (0.80–0.96)  | 0.0045  |
| RV S'                                        | 0.74 (0.64–0.87)  | <0.0001 |
| TAPSE/Systolic PAP ratio                     | 0.01 (0.00–0.17)  | 0.011   |
| RA area                                      | 1.10 (1.04–1.17)  | 0.0018  |
| RV diameter                                  | 1.07 (1.02–1.12)  | 0.0076  |
| <b>Renal function</b>                        |                   |         |
| Serum creatinine                             | 2.14 (1.05–4.40)  | 0.0376  |
| Urea                                         | 1.01 (1.00–1.02)  | 0.0262  |
| <b>Renal Doppler ultrasonography</b>         |                   |         |
| RVSI tertiles                                |                   | 0.065   |
| 1 <sup>st</sup> tertile RVSI group vs RVSI=0 | 2.00 (0.48–8.38)  | 0.342   |
| 2 <sup>nd</sup> tertile RVSI group vs RVSI=0 | 1.25 (0.25–6.17)  | 0.788   |
| 3 <sup>rd</sup> tertile RVSI group vs RVSI=0 | 4.33 (1.19–15.72) | 0.026   |
| Congestion stages                            | 1.39 (1.10–1.77)  | 0.0066  |
| Stage 1 congestion vs stage 0                | 1.29 (0.31–5.38)  | 0.732   |
| Stage 2 congestion vs stage 0                | 3.84 (1.02–14.48) | 0.0469  |
| Stage 3 congestion vs stage 0                | 4.03 (0.96–16.86) | 0.0564  |
| <b>Neurohormonal status</b>                  |                   |         |
| BNP                                          | 1.00 (1.00–1.00)  | 0.0012  |
| Copeptin                                     | 1.02 (1.00–1.04)  | 0.0193  |
| <b>Intra-abdominal pressure measurement</b>  |                   |         |
| Intra-abdominal pressure                     | 1.22 (1.06–1.41)  | 0.0069  |

All available study variables were included in the univariate analysis, but only variables that were significant in the univariate analysis are presented here.

6MWD=6-min walk distance; BNP=b-type natriuretic peptide; CI=confidence interval; HR=hazard ratio; NYHA=New York Heart Association; PAP=pulmonary arterial pressure; RA=right atrial; RAP=right atrial pressure; RV=right ventricular; RV S'=systolic annular tissue velocity of the lateral tricuspid annulus; RVSI=renal venous stasis index; TAPSE=tricuspid annular plane systolic excursion.



**Table S13. Performance of RVSI versus IRVF patterns in models including both variables for prediction of secondary endpoints.**

| Secondary endpoint | Wald statistic                                  |                                   |                     |
|--------------------|-------------------------------------------------|-----------------------------------|---------------------|
|                    | Unplanned hospitalization due to fluid overload | Escalation of PH-specific therapy | All-cause mortality |
| RVSI               | 6.163                                           | 0.721                             | 0.611               |
| IRVF patterns      | 0.996                                           | 2.675                             | 0.204               |

Higher Wald statistic indicates superiority for prediction of endpoint. RVSI was superior to IRVF patterns in models including both RVSI and IRVF patterns as predictor variables for all component endpoints except need for escalation of PH-specific therapy.

IRVF=intrarenal venous flow; PH=pulmonary hypertension; RVSI=renal venous stasis index.

**Figure S1. IRVF patterns and associated clinical parameters.**

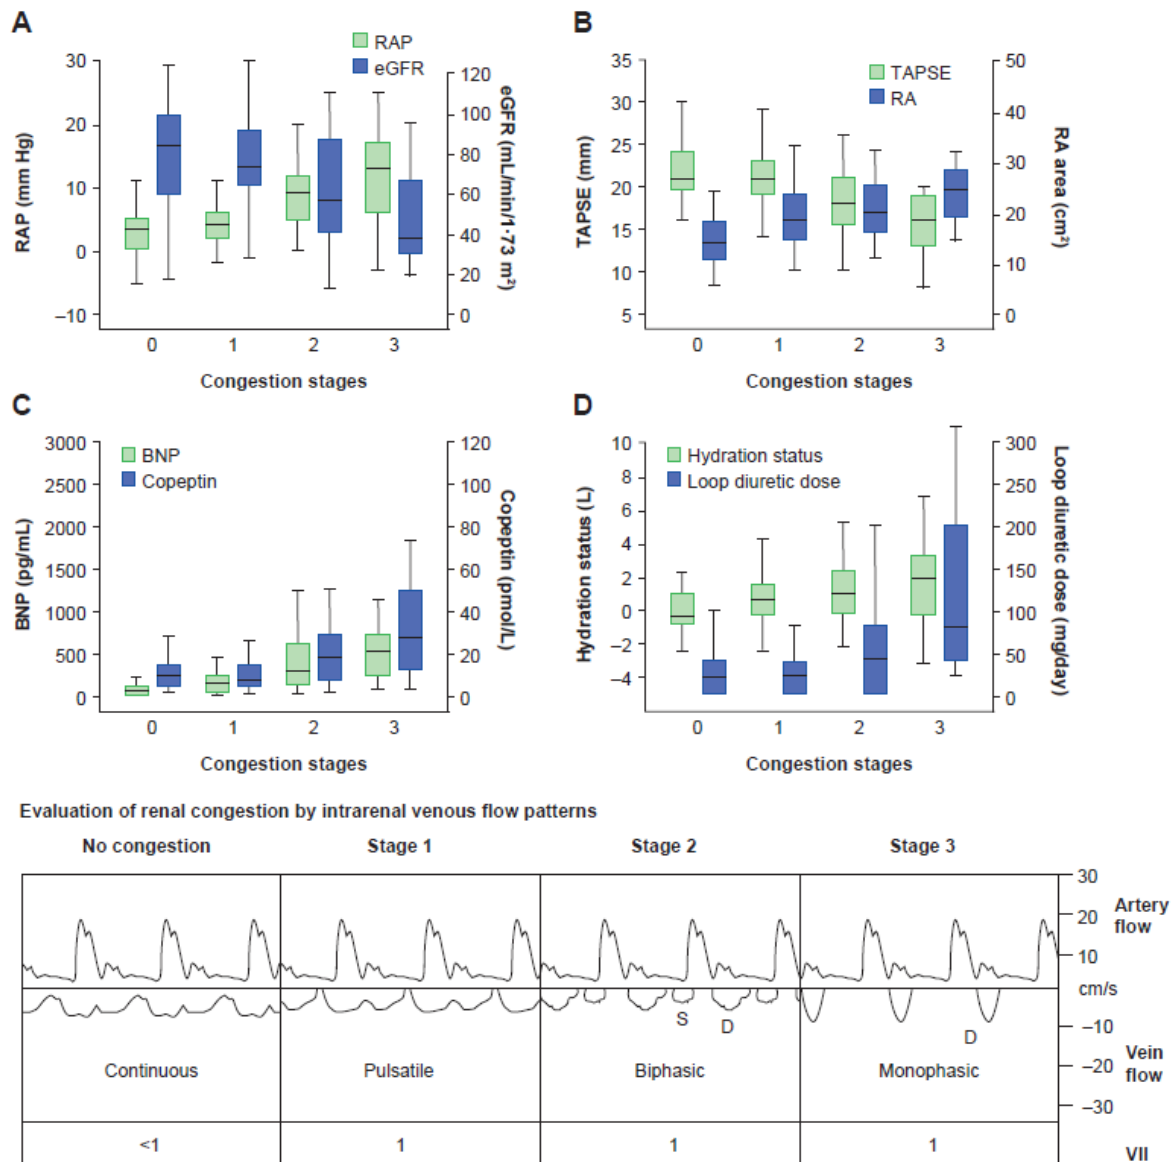

Severity of renal congestion can be evaluated by identifying four distinct IRVF patterns using renal Doppler ultrasonography. The figure illustrates the associations of these IRVF patterns with RAP and renal function (a), right ventricular systolic function and right atrial area (b), neurohormonal (c), and hydration status (d). Fluid overload as measured by bioimpedance is likely to occur as a result of hemodynamic alterations and neurohormonal activation leading to a deterioration of renal function and fluid retention.

BNP=b-type natriuretic peptide; D=diastole; eGFR=estimated glomerular filtration rate (based on Chronic Kidney Disease Epidemiology Collaboration creatinine-cystatin C equation<sup>22</sup>); IRVF=intrarenal venous flow; RA=right atrial; RAP=right atrial pressure; S=systole; TAPSE=tricuspid annular plane systolic excursion; VII=venous impedance index.

Figure S2. Correlation of RVSI with RAP (a), TAPSE (b), eGFR (c), and intra-abdominal pressure (d).

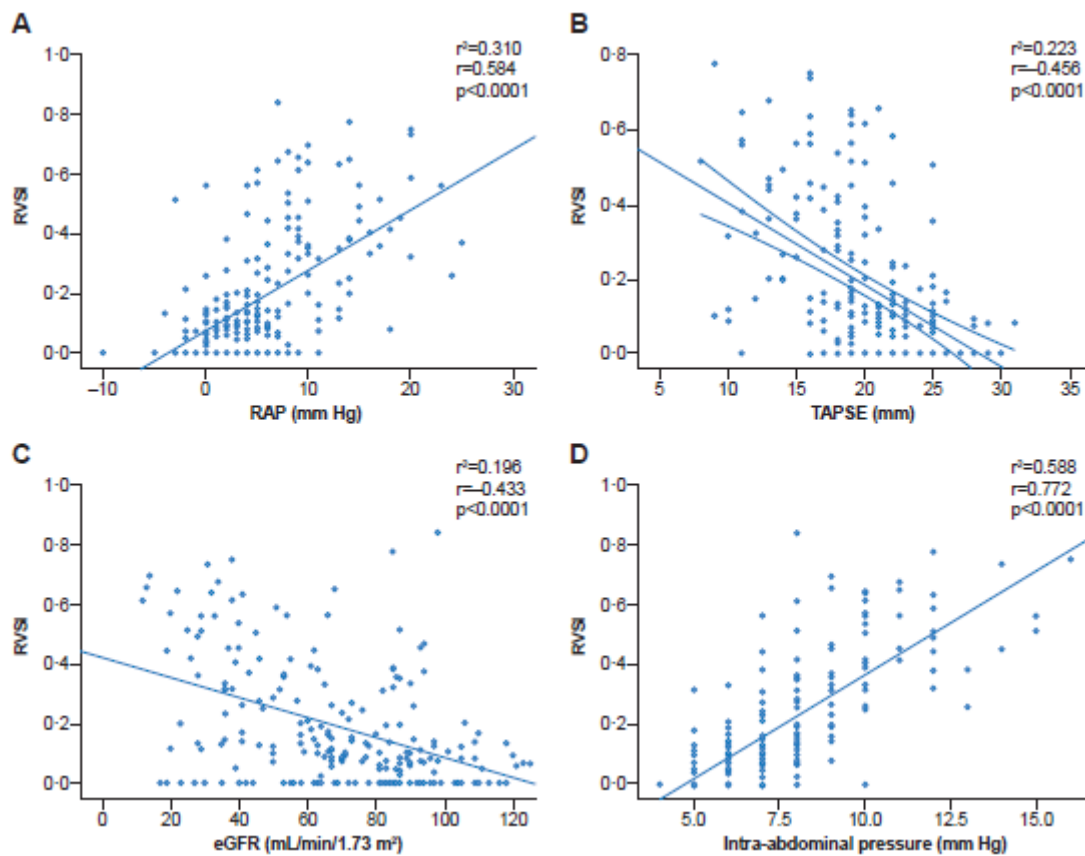

eGFR=estimated glomerular filtration rate (based on Chronic Kidney Disease Epidemiology Collaboration creatinine-cystatin C equation<sup>22</sup>); RAP=right atrial pressure; RVSI=renal venous stasis index; TAPSE=tricuspid annular plane systolic excursion.

Figure S3. Kaplan-Meier estimate curves according to RVSI tertiles.

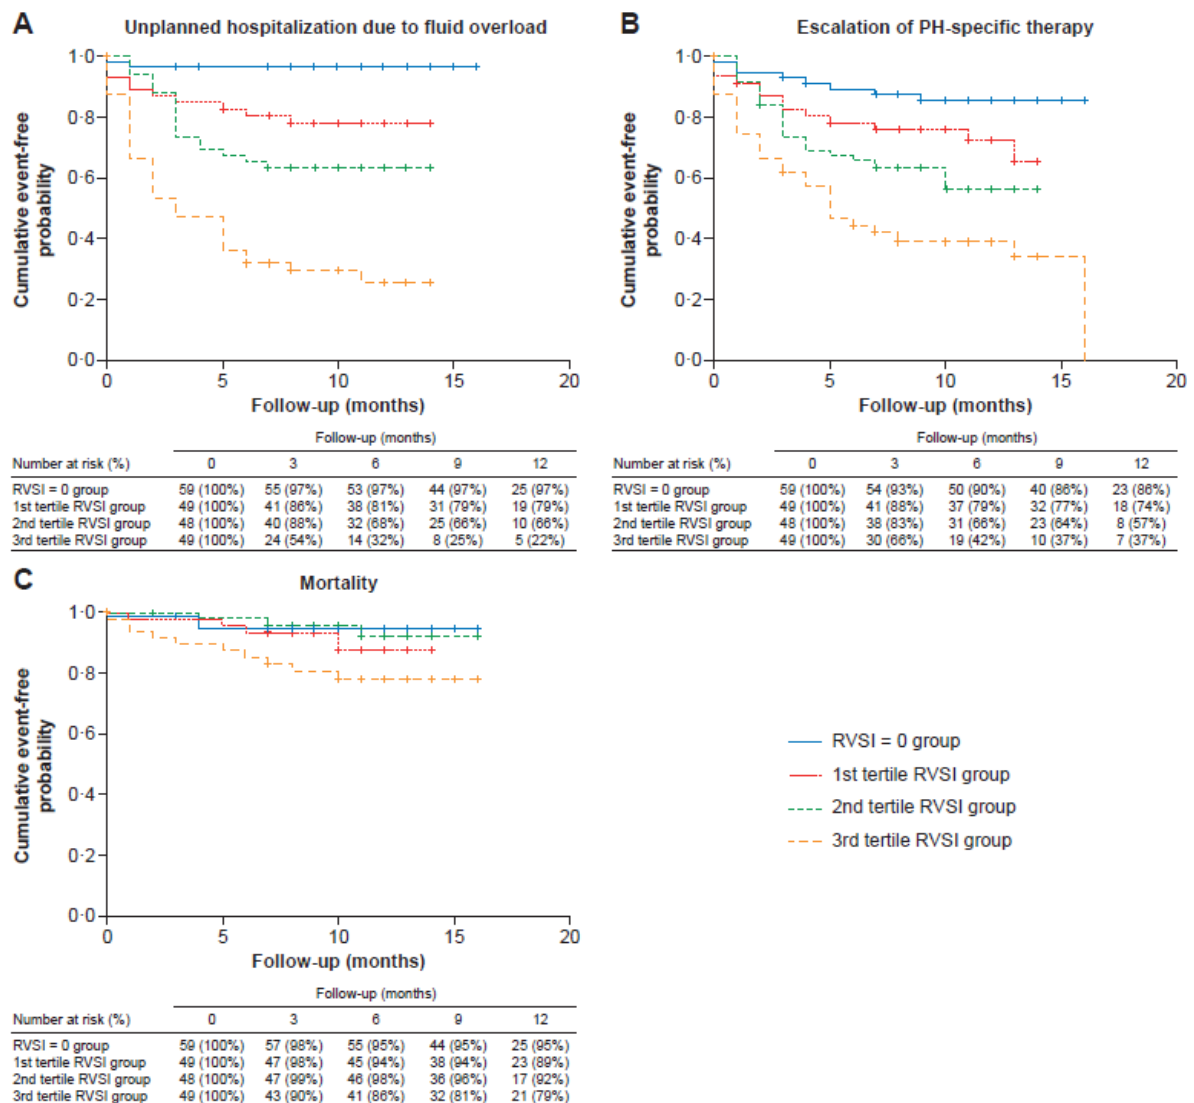

Patients in the 3<sup>rd</sup> tertile RVSI group had a significantly higher probability than other patients of the following individual components of the composite endpoint: unscheduled hospitalization for fluid overload ( $p < 0.0001$ ) (a) and escalation of PH-specific therapy ( $p < 0.0001$ ) (b). After Bonferroni correction, death from any cause did not show a significant difference between patients in the 3<sup>rd</sup> tertile RVSI group and other patients ( $p = 0.0412$ ) (c).

PH=pulmonary hypertension; RVSI = renal venous stasis index.

**Figure S4. Kaplan-Meier estimate curves according to IRVF patterns.**

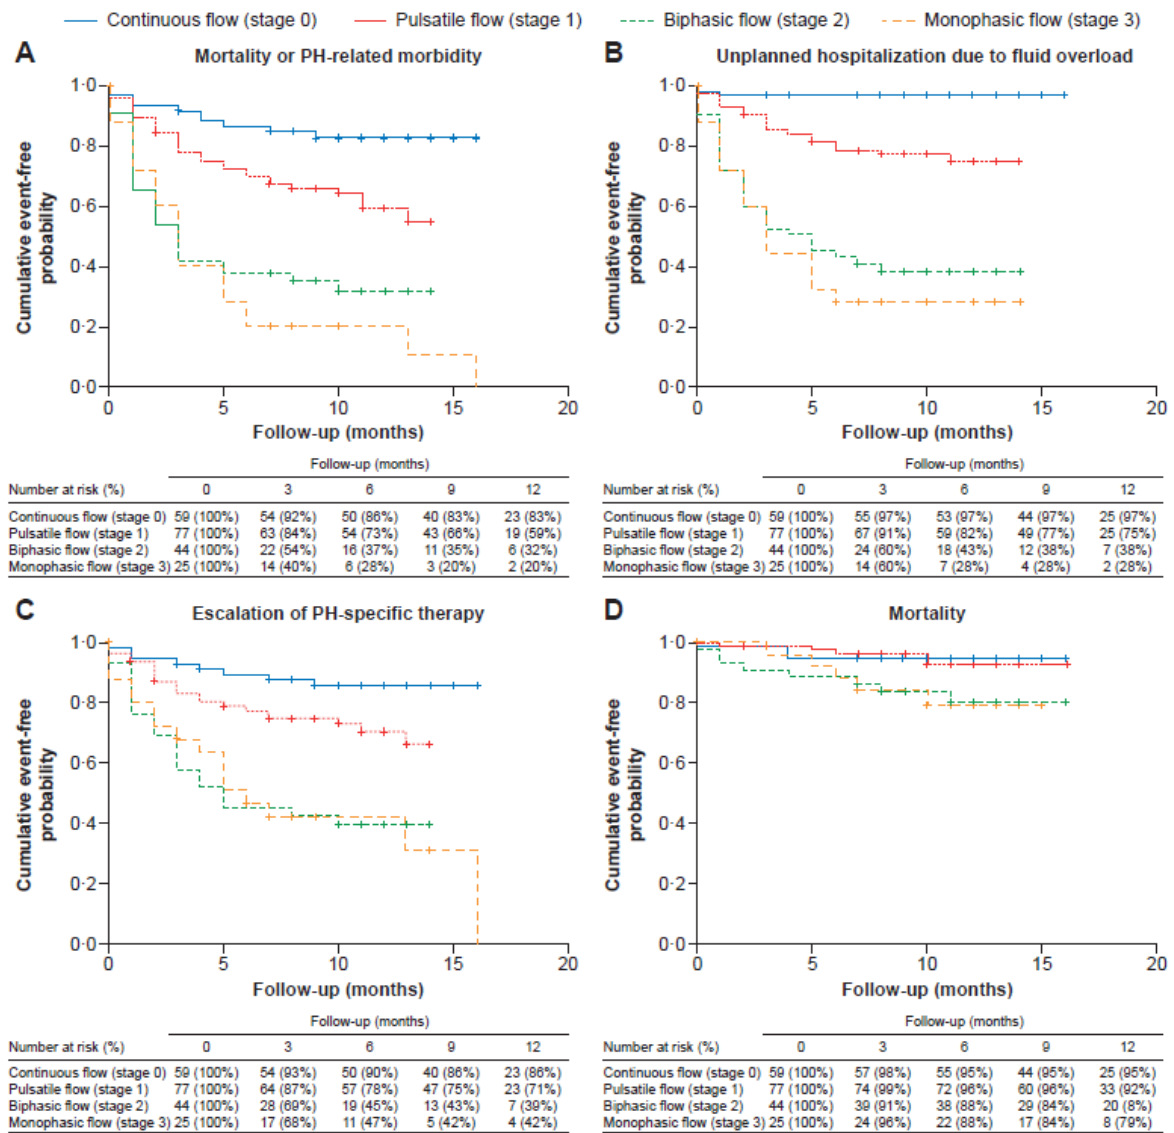

Patients in the highest IRVF pattern group had a significantly higher probability than other patients of the composite endpoint of PH-related morbidity or death from any cause ( $p < 0.0001$ ) (a) and the following individual components of the composite endpoint: unscheduled hospitalization for fluid overload ( $p < 0.0001$ ) (b) and escalation of PH-specific therapy ( $p < 0.0001$ ) (c). After Bonferroni correction, death from any cause did not show a significant difference between patients in the highest IRVF pattern group and other patients ( $p = 0.0387$ ) (d).

IRVF=intrarenal venous flow; PH=pulmonary hypertension.

**Figure S5. Comparison of RVSI and IRVF patterns as predictors of the primary and secondary clinical endpoints.**

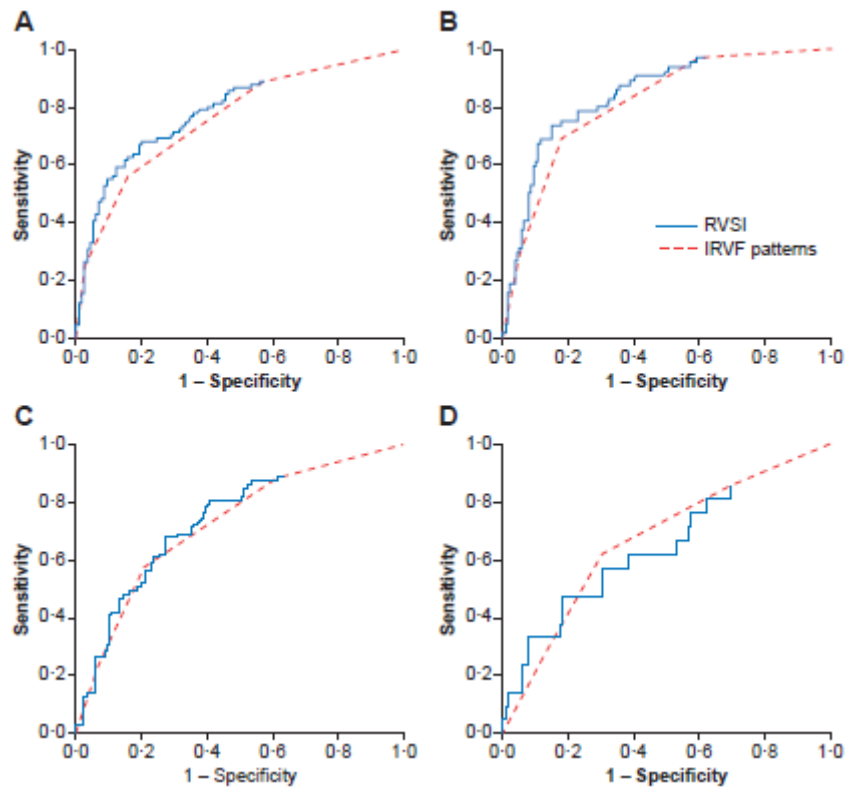

Receiver operating characteristic analyses indicate that RVSI was superior to the four IRVF patterns as a predictor of the composite primary endpoint (AUC: 0.789 and 0.761, respectively;  $p=0.038$ ) **(a)**, and for the prediction of unplanned hospitalization due to fluid overload (AUC: 0.843 and 0.813, respectively;  $p=0.045$ ) **(b)** but not escalation of pulmonary hypertension-specific therapy (AUC: 0.737 and 0.724, respectively;  $p=0.36$ ) **(c)**, nor all-cause mortality (AUC: 0.650 and 0.668, respectively;  $p=0.37$ ) **(d)**. Diagonal segments are produced by ties.

AUC=area under the curve; IRVF=intrarenal venous flow; RVSI=renal venous stasis index.

## SUPPLEMENTAL REFERENCES:

1. Galie N, Humbert M, Vachiery JL, Gibbs S, Lang I, Torbicki A, Simonneau G, Peacock A, Vonk Noordegraaf A, Beghetti M, Ghofrani A, Gomez Sanchez MA, Hansmann G, Klepetko W, Lancellotti P, Matucci M, McDonagh T, Pierard LA, Trindade PT, Zompatori M, Hoeper M and Group ESCSD. 2015 ESC/ERS Guidelines for the diagnosis and treatment of pulmonary hypertension: The Joint Task Force for the Diagnosis and Treatment of Pulmonary Hypertension of the European Society of Cardiology (ESC) and the European Respiratory Society (ERS): Endorsed by: Association for European Paediatric and Congenital Cardiology (AEPC), International Society for Heart and Lung Transplantation (ISHLT). *Eur Heart J*. 2016; 37:67-119.
2. Kushner RF. Bioelectrical impedance analysis: a review of principles and applications. *J Am Coll Nutr*. 1992; 11:199-209.
3. McCullough PA and Brown JR. Effects of Intra-Arterial and Intravenous Iso-Osmolar Contrast Medium (Iodixanol) on the Risk of Contrast-Induced Acute Kidney Injury: A Meta-Analysis. *Cardiorenal Med*. 2011; 1:220-234.
4. Chamney PW, Wabel P, Moissl UM, Muller MJ, Bosy-Westphal A, Korth O and Fuller NJ. A whole-body model to distinguish excess fluid from the hydration of major body tissues. *Am J Clin Nutr*. 2007; 85:80-9.
5. Moissl UM, Wabel P, Chamney PW, Bosaeus I, Levin NW, Bosy-Westphal A, Korth O, Muller MJ, Ellegard L, Malmros V, Kaitwatcharachai C, Kuhlmann MK, Zhu F and Fuller NJ. Body fluid volume determination via body composition spectroscopy in health and disease. *Physiol Meas*. 2006; 27:921-33.
6. Passauer J, Petrov H, Schleser A, Leicht J and Pucalka K. Evaluation of clinical dry weight assessment in haemodialysis patients using bioimpedance spectroscopy: a cross-sectional study. *Nephrol Dial Transplant*. 2010;25: 545-51.
7. Marcelli D, Usvyat LA, Kotanko P, Bayh I, Canaud B, Etter M, Gatti E, Grassmann A, Wang Y, Marelli C, Scatizzi L, Stopper A, van der Sande FM, Kooman J and Consortium MODO. Body composition and survival in dialysis patients: results from an international cohort study. *Clin J Am Soc Nephrol*. 2015; 10:1192-200.
8. Valtuille R, Casos ME, Fernandez EA, Guinsburg A and Marelli C. Nutritional Markers and Body Composition in Hemodialysis Patients. *Int Sch Res Notices*. 2015; 2015:695263.
9. Buch E, Bradfield J, Larson T and Horwich T. Effect of bioimpedance body composition analysis on function of implanted cardiac devices. *Pacing Clin Electrophysiol*. 2012; 35:681-4.
10. Wabel P, Moissl U, Chamney P, Jirka T, Machek P, Ponce P, Taborsky P, Tetta C, Velasco N, Vlasak J, Zaluska W and Wizemann V. Towards improved cardiovascular management: the necessity of combining blood pressure and fluid overload. *Nephrol Dial Transplant*. 2008; 23:2965-71.
11. Wieskotten S, Heinke S, Wabel P, Moissl U, Becker J, Pirlich M, Keymling M and Isermann R. Bioimpedance-based identification of malnutrition using fuzzy logic. *Physiol Meas*. 2008;29:639-54.
12. Ronco C, Verger C, Crepaldi C, Pham J, De Los Rios T, Gauly A, Wabel P, Van Biesen W and Group I-PS. Baseline hydration status in incident peritoneal dialysis patients: the initiative of patient outcomes in dialysis (I-POD-PD study) dagger. *Nephrol Dial Transplant*. 2015; 30:849-58.
13. Ponikowski P, Voors AA, Anker SD, Bueno H, Cleland JG, Coats AJ, Falk V, Gonzalez-Juanatey JR, Harjola VP, Jankowska EA, Jessup M, Linde C, Nihoyannopoulos P, Parissis JT, Pieske B, Riley JP, Rosano GM, Ruilope LM, Ruschitzka F, Rutten FH, van der Meer P and Authors/Task Force M. 2016 ESC Guidelines for the diagnosis and treatment of acute and chronic heart failure: The Task Force for the diagnosis and treatment of acute and chronic heart failure of the European Society of Cardiology (ESC). Developed with the special contribution of the Heart Failure Association (HFA) of the ESC. *Eur Heart J*. 2016; 37:2129-200.
14. Morgenthaler NG, Struck J, Alonso C and Bergmann A. Assay for the measurement of copeptin, a stable peptide derived from the precursor of vasopressin. *Clin Chem*. 2006; 52:112-9.
15. Cystatin C. CKD-EPI (Chronic Kidney Disease Epidemiology Collaboration). (Accessed 27 Oct, at <http://ckdepi.org/assays/cystatin-c/>).
16. Brisco MA, Coca SG, Chen J, Owens AT, McCauley BD, Kimmel SE and Testani JM. Blood urea nitrogen/creatinine ratio identifies a high-risk but potentially reversible form of renal dysfunction in patients with decompensated heart failure. *Circulation Heart Fail*. 2013; 6:233-9.
17. Kidney Disease: Improving Global Outcomes (KDIGO) CKD Work Group. KDIGO 2012 Clinical Practice Guideline for the Evaluation and Management of Chronic Kidney Disease. *Kidney Int Suppl* 2013; 1-150.
18. Yu H, Yanagisawa Y, Forbes MA, Cooper EH, Crockson RA and MacLennan IC. Alpha-1-microglobulin: an indicator protein for renal tubular function. *J Clin Pathol*. 1983; 36:253-9.
19. Kohler H, Wandel E and Brunck B. Acanthocyturia--a characteristic marker for glomerular bleeding. *Kidney Int*. 1991; 40:115-20.
20. Wise GJ and Schlegel PN. Sterile pyuria. *New Engl J Med*. 2015;372:1048-54.
21. Kidney Disease: Improving Global Outcomes (KDIGO) Acute Kidney Injury Work Group. KDIGO Clinical Practice Guideline for Acute Kidney Injury. *Kidney Int Suppl*. 2012; 1-138.

22. Inker LA, Schmid CH, Tighiouart H, Eckfeldt JH, Feldman HI, Greene T, Kusek JW, Manzi J, Van Lente F, Zhang YL, Coresh J, Levey AS and Investigators C-E. Estimating glomerular filtration rate from serum creatinine and cystatin C. *New Engl J Med*. 2012; 367:20-9.
23. Levey AS, Stevens LA, Schmid CH, Zhang YL, Castro AF, 3rd, Feldman HI, Kusek JW, Eggers P, Van Lente F, Greene T, Coresh J and CKD EPI. A new equation to estimate glomerular filtration rate. *Ann Int Med*. 2009; 150:604-12.
24. Mullens W, Abrahams Z, Skouri HN, Francis GS, Taylor DO, Starling RC, Paganini E and Tang WH. Elevated intra-abdominal pressure in acute decompensated heart failure: a potential contributor to worsening renal function? *J Am Coll Cardiol*. 2008; 51:300-6.
25. Levey AS, Stevens LA, Schmid CH, Zhang YL, Castro AF, 3rd, Feldman HI, Kusek JW, Eggers P, Van Lente F, Greene T, Coresh J and CKD EPI. A new equation to estimate glomerular filtration rate. *Ann Int Med*. 2009; 150:604-12.
